# Supplementary material for: Volcanism straddling the Mio-Pliocene boundary on Patmos (East Aegean Sea): Insights from new 40 Ar/ 39 Ar ages
Source: Copernicus journal article supplement (doi:10.5194/gchron-2023-11), 2023-05-02
Supplement: Supplementary file 1 [file TablesS1_S2_S3.xlsx]

## Sheet: TableS1
Table S1. Argon data corrected for background, baseline, gain, mass discrimination, reactor interferences and radioactive decay.
Incremental Heating			36Ar(a) [fA]	37Ar(ca) [fA]	38Ar(cl) [fA]	39Ar(k) [fA]	40Ar(r) [fA]	Age	± 2s	40Ar(r)	39Ar(k)	K/Ca	± 2s		Inverse Isochron			39(k)/40(a+r)	± 2s	36(a)/40(a+r)	± 2s			r.i.
								(Ma)		(%)	(%)
011_VU114-KB1	fusion	included	0.02276	0.887555	0	61.957	99.1804	5.15254	0.03135	93.5409	4.91421	30.0168	0.771771		011_VU114-KB1	12	4	0.584635	0.00310714	0.000214766	8.96086e-06			0.0225802
012_VU114-KB1	fusion	included	0.105547	0.919105	0	67.5224	108.02	5.14925	0.0382091	77.3837	5.35563	31.5901	0.749632		012_VU114-KB1	12	4	0.483919	0.00232822	0.000756435	1.39518e-05			0.0531099
013_VU114-KB1	fusion	included	0.0839495	0.913999	0	66.6091	107.008	5.1709	0.0373537	80.9874	5.2832	31.3369	0.599421		013_VU114-KB1	12	4	0.50434	0.00245151	0.000635635	1.38612e-05			0.0478826
014_VU114-KB1	fusion	included	0.0750335	0.893668	9.34702e-05	56.4598	90.6109	5.16566	0.0384856	80.143	4.47819	27.1664	0.604555		014_VU114-KB1	12	4	0.499587	0.00247343	0.000663938	1.42826e-05			0.0493909
015_VU114-KB1	fusion	included	0.0333552	0.74688	0.00393166	57.844	92.5042	5.14743	0.0302424	90.237	4.58798	33.3024	0.972266		015_VU114-KB1	12	4	0.564537	0.00272892	0.000325535	9.61939e-06			0.0350941
017_VU114-KB1	fusion	included	0.0226757	0.963946	0	59.2472	94.9661	5.15924	0.0297186	93.2987	4.69928	26.4292	0.590369		017_VU114-KB1	12	4	0.582362	0.00288393	0.000222887	8.79897e-06			0.0290063
018_VU114-KB1	fusion	included	0.0339681	1.26208	0.00261011	64.5579	103.762	5.17335	0.0296164	91.052	5.1205	21.9954	0.575351		018_VU114-KB1	12	4	0.566778	0.00285081	0.000298218	7.689e-06			0.0463446
019_VU114-KB1	fusion	included	0.0404368	0.752794	0	63.9147	102.784	5.17614	0.0296203	89.446	5.06948	36.5084	0.977704		019_VU114-KB1	12	4	0.556475	0.00269476	0.000352064	8.54559e-06			0.0434812
020_VU114-KB1	fusion	included	0.0327295	0.801621	0.000104458	61.9285	99.4029	5.16646	0.0282952	91.0051	4.91194	33.2192	0.850133		020_VU114-KB1	12	4	0.567242	0.00277631	0.00029979	6.81652e-06			0.0496427
021_VU114-KB1	fusion	included	0.0290865	0.83724	0.00638561	66.2584	106.546	5.17582	0.0280048	92.418	5.25538	34.0298	0.823233		021_VU114-KB1	12	4	0.57501	0.00277763	0.000252421	7.03695e-06			0.0379246
023_VU114-KB1	fusion		0.193863	1.07999	0.00505627	49.1693	79.4476	5.20076	0.0740254	57.8348	3.89993	19.5768	0.488158		023_VU114-KB1	12		0.358044	0.00173317	0.00141169	2.5288e-05			0.0564334
024_VU114-KB1	fusion	included	0.0547926	1.25624	0.00436504	77.6456	125.105	5.18607	0.0299698	88.3942	6.15857	26.5774	0.66863		024_VU114-KB1	12	4	0.548874	0.00266055	0.000387327	8.70151e-06			0.0453145
025_VU114-KB1	fusion	included	0.0843383	0.76247	0.00613338	54.2475	87.2762	5.17844	0.0392845	77.5768	4.30272	30.5932	0.833338		025_VU114-KB1	12	4	0.482388	0.00235319	0.000749966	1.43689e-05			0.055632
026_VU114-KB1	fusion	included	0.026785	0.959763	0	58.8408	94.3809	5.16286	0.0300043	92.1433	4.66704	26.3623	0.60785		026_VU114-KB1	12	4	0.574741	0.00291875	0.000261629	8.27863e-06			0.0316019
027_VU114-KB1	fusion	included	0.0222377	0.799383	0.00175487	70.2854	112.874	5.16907	0.0268774	94.397	5.57479	37.8076	0.90973		027_VU114-KB1	12	4	0.588098	0.00285627	0.000186069	5.39794e-06			0.0360602
029_VU114-KB1	fusion	included	0.0334094	1.00892	0.00290439	71.6955	115.252	5.17417	0.0293471	91.9894	5.68663	30.5566	0.621012		029_VU114-KB1	12	4	0.572525	0.00290196	0.000266791	7.22689e-06			0.0437784
030_VU114-KB1	fusion	included	0.0370979	0.830917	0	63.4642	102.029	5.17462	0.0298186	90.1639	5.03375	32.8428	0.656624		030_VU114-KB1	12	4	0.561108	0.00273885	0.000327995	8.7095e-06			0.0395907
031_VU114-KB1	fusion	included	0.0348931	0.777758	0.000358661	55.6551	89.4292	5.172	0.0289289	89.5234	4.41436	30.7701	0.730949		031_VU114-KB1	12	4	0.557404	0.00269365	0.000349466	7.81624e-06			0.0466302
032_VU114-KB1	fusion	included	0.040101	1.00868	0	69.1425	111.338	5.18297	0.0286292	90.2472	5.48414	29.4754	0.740679		032_VU114-KB1	12	4	0.560721	0.00269752	0.000325204	7.61912e-06			0.0435855
033_VU114-KB1	fusion	included	0.0370454	1.17716	0.00245239	64.3284	103.336	5.17049	0.02987	90.2879	5.1023	23.4983	0.552047		033_VU114-KB1	12	4	0.562331	0.00273681	0.000323835	8.90133e-06			0.037584
		S	1.04411	18.6402	0.0361503	1260.77	2025.25			88.6439
Information on Analysis				Results		40(r)/39(k)	± 2s	Age	± 2s	MSWD	39Ar(k)	K/Ca	± 2s		Results			40(a)/36(a)	± 2s	40(r)/39(k)	± 2s	Age	± 2s	MSWD
								(Ma)			(%,n)											(Ma)
Sample = 011_VU114-KB1				Age Plateau		1.606	0.00218894	5.16929	0.0218138	0.457174	96.1001	29.1116	1.87327		Inverse Isochron			298.51	6.62615	1.60605	0.00476325	5.16943	0.0257052	0.484414
Material = san							0.00136297		0.00421987	0.975027	19								0.0221974		0.00296582		0.00497254	0.961259
Location = Patmos				Full External Error					0.110041	1.66667	2σ Confidence Limit				Full External Error								0.11088
Analyst = Ina Boehm				Analytical Error					0.00703566	1	Error Magnification				Analytical Error								0.01531
Project = PATMOS
Mass Discrimination Law = LIN				Total Fusion Age		1.60636	0.0023327	5.17042	0.0219714		20	29.0841	0.159255
Irradiation = VU114							0.00145217		0.00424944						Statistics			2σ Confidence Limit	1.68599		Convergence	0.000639343
J = 0.00175990 ± 0.00000352				Full External Error					0.110095									Error Magnification	1		Number of Iterations	2
Fcs 250-400 = 28.201 ± 0.006 Ma				Analytical Error					0.00749773									Number of Data Points	19		Calculated Line	Weighted York-2
																		Spreading Factor	0.169775
Incremental Heating			36Ar(a) [fA]	37Ar(ca) [fA]	38Ar(cl) [fA]	39Ar(k) [fA]	40Ar(r) [fA]	Age	± 2s	40Ar(r)	39Ar(k)	K/Ca	± 2s		Inverse Isochron			39(k)/40(a+r)	± 2s	36(a)/40(a+r)	± 2s			r.i.
								(Ma)		(%)	(%)
003_VU114-KB2_COMBINED	fusion		0.014437	0.0725534	0.00195202	2.80786	4.82312	5.52832	0.411047	52.7934	0.154386	16.6413	2.76735		003_VU114-KB2_COMBINED	12		0.307427	0.003193	0.00158067	0.000129334			0.0571857
004_VU114-KB2_COMBINED	fusion	included	1.3625	2.39063	0.0450967	79.8467	130.147	5.24627	0.38629	24.2358	4.39023	14.3619	0.309615		004_VU114-KB2_COMBINED	12	4	0.148709	0.000900356	0.00253755	5.92641e-05			0.0333922
005_VU114-KB2_COMBINED	fusion	included	1.10124	3.18669	0.0549631	110.408	181.562	5.29289	0.228076	35.5694	6.07061	14.8981	0.318238		005_VU114-KB2_COMBINED	12	4	0.216339	0.00130944	0.00215782	5.04696e-05			0.0340442
007_VU114-KB2_COMBINED	fusion	included	2.19166	3.54433	0.0651861	117.718	191.159	5.22671	0.419381	22.6062	6.47253	14.2816	0.307572		007_VU114-KB2_COMBINED	12	4	0.139229	0.000841851	0.00259214	6.02826e-05			0.0334885
008_VU114-KB2_COMBINED	fusion	included	1.37813	3.26359	0.059152	120.362	196.494	5.25455	0.260158	32.3154	6.61788	15.8585	0.338019		008_VU114-KB2_COMBINED	12	4	0.19798	0.001196	0.00226685	5.28489e-05			0.0333585
009_VU114-KB2_COMBINED	fusion	included	1.16696	2.99765	0.0583872	103.179	168.22	5.24761	0.258064	32.5557	5.67312	14.8006	0.312664		009_VU114-KB2_COMBINED	12	4	0.199717	0.00121308	0.0022588	5.28634e-05			0.0347107
010_VU114-KB2_COMBINED	fusion	included	0.972117	2.29782	0.0381965	80.0122	131.249	5.27972	0.277033	31.1346	4.39933	14.973	0.330233		010_VU114-KB2_COMBINED	12	4	0.189834	0.00115281	0.00230641	5.40115e-05			0.0341356
011_VU114-KB2_COMBINED	fusion	included	1.03228	2.39126	0.043226	81.2028	134.395	5.32693	0.289387	30.3606	4.46479	14.602	0.330083		011_VU114-KB2_COMBINED	12	4	0.183471	0.00111785	0.00233235	5.4554e-05			0.0349254
013_VU114-KB2_COMBINED	fusion	included	0.908771	2.51482	0.0471331	85.908	142.507	5.33908	0.242688	34.43	4.72351	14.6891	0.322642		013_VU114-KB2_COMBINED	12	4	0.207593	0.00126319	0.002196	5.16017e-05			0.0329736
014_VU114-KB2_COMBINED	fusion	included	0.830499	3.04738	0.0604011	109.728	183.037	5.36883	0.174815	42.4596	6.03323	15.4832	0.331584		014_VU114-KB2_COMBINED	12	4	0.254596	0.00154923	0.00192695	4.51079e-05			0.0330894
015_VU114-KB2_COMBINED	fusion	included	0.80245	2.99887	0.0510206	104.735	173.476	5.33104	0.177199	41.989	5.75867	15.0177	0.330127		015_VU114-KB2_COMBINED	12	4	0.253562	0.00153368	0.00194272	4.55766e-05			0.034383
016_VU114-KB2_COMBINED	fusion	included	0.547142	2.30625	0.0381984	76.7898	127.96	5.3633	0.167214	43.9151	4.22216	14.3174	0.332438		016_VU114-KB2_COMBINED	12	4	0.263597	0.00162922	0.00187818	4.45398e-05			0.035061
017_VU114-KB2_COMBINED	fusion	included	1.18048	3.46663	0.0423026	83.9884	137.944	5.28631	0.319506	28.1254	4.61796	10.4179	0.214453		017_VU114-KB2_COMBINED	12	4	0.17127	0.00103596	0.00240724	5.63309e-05			0.0333525
035_VU114-KB2	fusion	included	0.8754	3.30046	0.00973822	112.245	188.102	5.39366	0.132015	41.8415	6.17159	14.6238	0.270693		035_VU114-KB2	12	4	0.249732	0.00119277	0.00194767	3.30776e-05			0.0569333
036_VU114-KB2	fusion	included	0.930222	2.79103	0.0146375	96.6152	161.07	5.36576	0.162063	36.7003	5.31222	14.885	0.24764		036_VU114-KB2	12	4	0.220182	0.00105151	0.00211993	3.61275e-05			0.056259
037_VU114-KB2	fusion	included	1.70603	3.7306	0.0182942	127.108	212.039	5.36913	0.221984	29.3886	6.98879	14.6508	0.254834		037_VU114-KB2	12	4	0.176198	0.000842154	0.00236492	3.99245e-05			0.0567547
038_VU114-KB2	fusion	included	1.42983	3.20714	0.0111739	113.707	188.918	5.34748	0.208817	30.6733	6.25199	15.2454	0.284721		038_VU114-KB2	12	4	0.184647	0.000884105	0.00232187	3.9309e-05			0.0568621
039_VU114-KB2	fusion	included	1.61356	3.25932	0.0135246	94.8863	157.075	5.32806	0.282586	24.5852	5.21716	12.5183	0.206589		039_VU114-KB2	12	4	0.148534	0.000711627	0.00252585	4.30262e-05			0.0560765
045_VU114-KB2	fusion	included	0.977551	2.95664	0.00753265	117.487	195.471	5.35494	0.140504	40.1024	6.45983	17.0868	0.328161		045_VU114-KB2	12	4	0.241084	0.00115565	0.00200594	3.40892e-05			0.0575467
		S	21.0212	53.7237	0.680116	1818.73	3005.65			33.4993
Information on Analysis				Results		40(r)/39(k)	± 2s	Age	± 2s	MSWD	39Ar(k)	K/Ca	± 2s		Results			40(a)/36(a)	± 2s	40(r)/39(k)	± 2s	Age	± 2s	MSWD
								(Ma)			(%,n)											(Ma)
Sample = 003_VU114-KB2				Age Plateau Overestimated Error		1.65957	0.0152675	5.34147	0.0535055	0.178477	99.8456	14.2358	0.767901		Inverse Isochron Overestimated Error			295.825	5.40706	1.68684	0.0558595	5.42908	0.180822	0.128485
Material = san							0.00919964		0.010017	0.999925	18								0.0182779		0.0331149		0.0333062	0.999988
Location = Patmos				Full External Error					0.123624	1.68599	2σ Confidence Limit				Full External Error								0.213371
Analyst = Ina Boehm				Analytical Error					0.049068	1	Error Magnification				Analytical Error								0.179517
Project = PATMOS
Mass Discrimination Law = LIN				Total Fusion Age		1.6526	0.0184299	5.31906	0.0629272		19	14.557	0.0701412
Irradiation = VU114							0.0111521		0.0118305						Statistics			2σ Confidence Limit	1.70711		Convergence	1.46261e-05
J = 0.00175990 ± 0.00000352				Full External Error					0.127577									Error Magnification	1		Number of Iterations	3
Fcs 250-400 = 28.201 ± 0.006 Ma				Analytical Error					0.0592323									Number of Data Points	18		Calculated Line	Weighted York-2
																		Spreading Factor	0.20979
Incremental Heating			36Ar(a) [fA]	37Ar(ca) [fA]	38Ar(cl) [fA]	39Ar(k) [fA]	40Ar(r) [fA]	Age	± 2s	40Ar(r)	39Ar(k)	K/Ca	± 2s		Inverse Isochron			39(k)/40(a+r)	± 2s	36(a)/40(a+r)	± 2s			r.i.
								(Ma)		(%)	(%)
015_VU114-KB3	fusion	included	0.016729	1.32115	0	46.8723	73.7967	5.37112	0.0528484	93.6131	3.90554	15.2557	0.376916		015_VU114-KB3	12	4	0.594892	0.0038632	0.000212321	2.27843e-05			0.0228666
016_VU114-KB3	fusion	included	0.357728	1.49365	0.00278923	56.0598	89.3343	5.4363	0.155346	45.5355	4.67107	16.1387	0.425397		016_VU114-KB3	12	4	0.285818	0.0018219	0.00182386	4.1417e-05			0.101448
017_VU114-KB3	fusion	included	0.765253	2.17683	0.00125526	81.0164	130.253	5.4846	0.215606	36.3027	6.75053	16.0036	0.297712		017_VU114-KB3	12	4	0.225844	0.00144522	0.00213325	4.62144e-05			0.106354
018_VU114-KB3	fusion		1.72413	3.32151	0.00732484	74.1662	116.988	5.38121	0.513045	18.5164	6.17975	9.60151	0.211469		018_VU114-KB3	12		0.117399	0.000739689	0.00272916	5.84132e-05			0.104354
019_VU114-KB3	fusion	included	0.117408	1.5971	0.00631568	61.1633	96.8461	5.40172	0.0658341	73.3949	5.09631	16.4674	0.438084		019_VU114-KB3	12	4	0.463711	0.00299165	0.000890133	2.40307e-05			0.0896778
021_VU114-KB3	fusion		0.252017	1.83467	0.00107555	66.6032	107.471	5.50459	0.0987527	58.8011	5.54958	15.6101	0.357123		021_VU114-KB3	12		0.364523	0.00231687	0.0013793	3.17522e-05			0.100254
022_VU114-KB3	fusion	included	0.0435652	1.37048	0	51.8005	81.892	5.39323	0.0552031	86.2535	4.31617	16.2529	0.403755		022_VU114-KB3	12	4	0.54585	0.00352813	0.000459069	2.20525e-05			0.0504699
023_VU114-KB3	fusion	included	0.66254	1.30352	0	42.4452	67.3282	5.41138	0.350134	25.3903	3.53666	14.0017	0.303081		023_VU114-KB3	12	4	0.160088	0.00101731	0.00249887	5.40325e-05			0.105898
024_VU114-KB3	fusion	included	0.583445	1.93329	0.00734858	70.8116	112.332	5.41177	0.191511	39.1966	5.90024	15.7498	0.386468		024_VU114-KB3	12	4	0.247139	0.0015777	0.00203628	4.47112e-05			0.104681
025_VU114-KB3	fusion	included	0.0522803	1.29367	0	52.5864	83.1248	5.3926	0.0559304	84.1524	4.38166	17.4791	0.474914		025_VU114-KB3	12	4	0.532609	0.00342343	0.000529509	2.19526e-05			0.0581286
027_VU114-KB3	fusion	included	0.283919	1.10321	0.00127672	38.7826	62.3139	5.48125	0.178252	42.3575	3.23148	15.1164	0.385781		027_VU114-KB3	12	4	0.263682	0.001694	0.00193036	4.42051e-05			0.102611
028_VU114-KB3	fusion	included	0.425803	1.46028	0.00138328	52.0709	83.1692	5.44882	0.191478	39.54	4.3387	15.333	0.381542		028_VU114-KB3	12	4	0.247607	0.00157825	0.00202477	4.47679e-05			0.105992
029_VU114-KB3	fusion	included	0.503077	1.66117	0.000152552	61.703	98.3148	5.43562	0.188766	39.5527	5.14128	15.972	0.393414		029_VU114-KB3	12	4	0.248289	0.00157967	0.00202434	4.42315e-05			0.105353
030_VU114-KB3	fusion	included	0.290023	1.95761	0.00554956	69.3373	110.606	5.44187	0.106578	56.0727	5.77739	15.2303	0.361449		030_VU114-KB3	12	4	0.351617	0.00223725	0.00147074	3.3531e-05			0.101315
031_VU114-KB3	fusion	included	0.730602	1.91286	0.00272442	67.0185	106.893	5.44113	0.245479	32.8821	5.58419	15.0654	0.323111		031_VU114-KB3	12	4	0.206197	0.00130898	0.00224786	4.83203e-05			0.105854
033_VU114-KB3	fusion	included	0.669712	2.25149	0.00390322	74.7244	119.374	5.44981	0.204493	37.3759	6.22626	14.2712	0.306344		033_VU114-KB3	12	4	0.234009	0.00149299	0.00209729	4.53247e-05			0.106119
034_VU114-KB3	fusion	included	0.725747	1.36834	0.00320148	45.919	72.8664	5.41345	0.352225	25.1624	3.82611	14.4301	0.382333		034_VU114-KB3	12	4	0.15859	0.00101387	0.0025065	5.38418e-05			0.106099
035_VU114-KB3	fusion	included	0.225796	1.76022	0	64.2845	101.913	5.40834	0.0953752	60.1676	5.35638	15.7039	0.384757		035_VU114-KB3	12	4	0.379647	0.00241949	0.00133349	3.18739e-05			0.0963066
036_VU114-KB3	fusion	included	0.809684	2.33335	0.00550572	73.654	117.624	5.44795	0.247553	32.7254	6.13707	13.5733	0.277279		036_VU114-KB3	12	4	0.204957	0.00129817	0.00225311	4.84581e-05			0.104933
037_VU114-KB3	fusion	included	0.232853	1.2231	0	49.1294	77.6109	5.38919	0.120203	52.7342	4.09361	17.2722	0.447078		037_VU114-KB3	12	4	0.333915	0.00213115	0.00158262	3.65561e-05			0.100903
		S	9.47231	34.6775	0.0498061	1200.15	1910.05			50.1339
Information on Analysis				Results		40(r)/39(k)	± 2s	Age	± 2s	MSWD	39Ar(k)	K/Ca	± 2s		Results			40(a)/36(a)	± 2s	40(r)/39(k)	± 2s	Age	± 2s	MSWD
								(Ma)			(%,n)											(Ma)
Sample = 015_VU114-KB3				Age Plateau Overestimated Error		1.58302	0.00700978	5.40041	0.0321781	0.270539	88.2707	15.2744	0.494884		Inverse Isochron Overestimated Error			300.546	2.37826	1.57799	0.00926901	5.38327	0.0382003	0.112969
Material = san							0.00442811		0.00595846	0.998696	18								0.00791313		0.00587395		0.00709613	0.999995
Location = Patmos				Full External Error					0.117178	1.68599	2σ Confidence Limit				Full External Error								0.118635
Analyst = Ina Boehm				Analytical Error					0.0238784	1	Error Magnification				Analytical Error								0.0315746
Project = PATMOS
Mass Discrimination Law = LIN				Total Fusion Age		1.59151	0.0151263	5.42934	0.0559033		20	14.8818	0.0802394
Irradiation = VU114							0.00950437		0.0102965						Statistics			2σ Confidence Limit	1.70711		Convergence	7.825e-05
J = 0.00186540 ± 0.00000373				Full External Error					0.12632									Error Magnification	1		Number of Iterations	3
Fcs 250-400 = 28.201 ± 0.006 Ma				Analytical Error					0.0515261									Number of Data Points	18		Calculated Line	Weighted York-2
																		Spreading Factor	0.688478
Incremental Heating			36Ar(a) [fA]	37Ar(ca) [fA]	38Ar(cl) [fA]	39Ar(k) [fA]	40Ar(r) [fA]	Age	± 2s	40Ar(r)	39Ar(k)	K/Ca	± 2s		Inverse Isochron			39(k)/40(a+r)	± 2s	36(a)/40(a+r)	± 2s			r.i.
								(Ma)		(%)	(%)
019_VU114-KB4_COMBINED	fusion	included	0.797925	2.44418	0.0299589	56.1124	93.5442	5.36561	0.326238	28.1912	6.83096	9.87175	0.21602		019_VU114-KB4_COMBINED	12	4	0.169129	0.00105088	0.00240504	5.67609e-05			0.0381873
020_VU114-KB4_COMBINED	fusion		0.694803	1.70862	0.0219055	41.0692	67.9365	5.32418	0.385674	24.6672	4.99964	10.3357	0.227458		020_VU114-KB4_COMBINED	12		0.149138	0.000907404	0.0025231	5.93275e-05			0.03464
021_VU114-KB4_COMBINED	fusion		1.54365	2.65603	0.0420859	66.581	110.558	5.34445	0.522423	19.3457	8.10539	10.7792	0.24503		021_VU114-KB4_COMBINED	12		0.116517	0.000707005	0.00270138	6.29337e-05			0.0337254
022_VU114-KB4_COMBINED	fusion	included	0.597082	1.5711	0.0221872	41.9509	70.4568	5.40553	0.327338	28.3235	5.10698	11.4817	0.268368		022_VU114-KB4_COMBINED	12	4	0.168666	0.00103519	0.0024006	5.68177e-05			0.0360654
023_VU114-KB4_COMBINED	fusion	included	0.721224	1.97918	0.026996	47.4451	79.2333	5.37497	0.348026	26.895	5.77583	10.308	0.239602		023_VU114-KB4_COMBINED	12	4	0.16107	0.00102687	0.00244846	5.76462e-05			0.0468913
025_VU114-KB4_COMBINED	fusion	included	0.555788	1.78979	0.0224679	44.4624	75.1464	5.4396	0.2875	31.1655	5.41273	10.6821	0.258417		025_VU114-KB4_COMBINED	12	4	0.184428	0.00113234	0.00230539	5.44525e-05			0.0354205
026_VU114-KB4_COMBINED	fusion	included	0.803547	2.31076	0.033439	64.5156	106.976	5.33685	0.283655	30.8342	7.85395	12.0054	0.275864		026_VU114-KB4_COMBINED	12	4	0.185987	0.00113254	0.00231648	5.41977e-05			0.0332879
027_VU114-KB4_COMBINED	fusion	included	0.559336	1.66609	0.0217083	40.5339	67.8835	5.39019	0.315808	28.8972	4.93448	10.4613	0.242674		027_VU114-KB4_COMBINED	12	4	0.172574	0.00106183	0.00238138	5.60618e-05			0.0348644
028_VU114-KB4_COMBINED	fusion	included	0.88526	2.11749	0.0279696	54.8878	92.085	5.3997	0.366342	25.835	6.68189	11.1461	0.246051		028_VU114-KB4_COMBINED	12	4	0.154011	0.00093417	0.00248398	5.8164e-05			0.033367
029_VU114-KB4_COMBINED	fusion	included	1.01017	2.89425	0.0397953	74.3781	125.178	5.41673	0.309713	29.3268	9.05457	11.0504	0.241481		029_VU114-KB4_COMBINED	12	4	0.17428	0.00106799	0.00236699	5.54943e-05			0.0367376
035_VU114-KB4_COMBINED	fusion	included	0.731452	1.89288	0.0234737	51.7934	86.9201	5.40135	0.322773	28.466	6.30518	11.7657	0.274539		035_VU114-KB4_COMBINED	12	4	0.169646	0.00103426	0.00239583	5.63615e-05			0.0328699
036_VU114-KB4_COMBINED	fusion	included	0.526916	2.34544	0.0290075	52.6808	88.4242	5.40226	0.23143	35.9762	6.41321	9.65822	0.218714		036_VU114-KB4_COMBINED	12	4	0.214376	0.0013081	0.0021442	5.07312e-05			0.0348111
037_VU114-KB4_COMBINED	fusion	included	0.592117	2.2757	0.033149	57.9383	97.09	5.39344	0.236579	35.4443	7.05324	10.9476	0.235789		037_VU114-KB4_COMBINED	12	4	0.211552	0.00129135	0.00216202	5.1218e-05			0.0332623
038_VU114-KB4_COMBINED	fusion	included	0.222407	2.2004	0.0265429	58.8593	98.2992	5.3752	0.0957363	59.6651	7.16536	11.5022	0.271114		038_VU114-KB4_COMBINED	12	4	0.35737	0.00218909	0.00135037	3.29422e-05			0.0351792
039_VU114-KB4_COMBINED	fusion	included	0.834565	2.66502	0.0338221	68.2338	114.919	5.42057	0.278976	31.5585	8.30659	11.0095	0.231201		039_VU114-KB4_COMBINED	12	4	0.187411	0.00113783	0.00229222	5.36792e-05			0.0345331
		S	11.0762	32.5169	0.434509	821.442	1374.65			32.3522
Information on Analysis				Results		40(r)/39(k)	± 2s	Age	± 2s	MSWD	39Ar(k)	K/Ca	± 2s		Results			40(a)/36(a)	± 2s	40(r)/39(k)	± 2s	Age	± 2s	MSWD
								(Ma)			(%,n)											(Ma)
Sample = 021_VU114-KB4				Age Plateau Overestimated Error		1.67375	0.0197783	5.38702	0.0671065	0.0402279	86.895	10.8204	0.394621		Inverse Isochron Overestimated Error			299.195	4.24825	1.66818	0.0421969	5.36912	0.137299	0.0360716
Material = san							0.0118168		0.0124571	1	13								0.0141989		0.0252952		0.025572	1
Location = Patmos				Full External Error					0.130904	1.8165	2σ Confidence Limit				Full External Error								0.1772
Analyst = Ina Boehm				Analytical Error					0.0635636	1	Error Magnification				Analytical Error								0.135614
Project = PATMOS
Mass Discrimination Law = LIN				Total Fusion Age		1.67346	0.0264188	5.38609	0.087588		15	10.8626	0.0640489
Irradiation = VU114							0.015787		0.0162619						Statistics			2σ Confidence Limit	1.8528		Convergence	1.78802e-05
J = 0.00175990 ± 0.00000352				Full External Error					0.142477									Error Magnification	1		Number of Iterations	3
Fcs 250-400 = 28.201 ± 0.006 Ma				Analytical Error					0.084905									Number of Data Points	13		Calculated Line	Weighted York-2
																		Spreading Factor	0.339239
Incremental Heating			36Ar(a) [fA]	37Ar(ca) [fA]	38Ar(cl) [fA]	39Ar(k) [fA]	40Ar(r) [fA]	Age	± 2s	40Ar(r)	39Ar(k)	K/Ca	± 2s		Inverse Isochron			39(k)/40(a+r)	± 2s	36(a)/40(a+r)	± 2s			r.i.
								(Ma)		(%)	(%)
049_VU114-KB5	fusion	included	0.078839	2.43888	0	82.0021	130.61	5.4336	0.0480701	84.6914	13.8279	14.4579	0.327305		043_VU114-KB5	12	4	0.430568	0.00282603	0.0010759	3.88525e-05			0.0698083
043_VU114-KB5	fusion	included	0.0622398	1.03949	0	24.908	39.2668	5.37812	0.100718	67.8528	4.2002	10.3035	0.284937		044_VU114-KB5	12	4	0.599157	0.00388017	0.00018014	2.90403e-05			0.0154908
044_VU114-KB5	fusion	included	0.010523	0.995884	0	35.0001	55.2738	5.38757	0.0608052	94.573	5.90202	15.1122	0.426633		045_VU114-KB5	12		0.289055	0.00242114	0.00182327	0.000170855			0.0536882
045_VU114-KB5	fusion		0.0181927	4.12052	0.00032733	2.8842	4.54644	5.37761	0.605383	45.5531	0.486359	0.300983	0.0058408		046_VU114-KB5	12	4	0.38294	0.00256498	0.00130814	5.00414e-05			0.0715969
046_VU114-KB5	fusion	included	0.0618265	0.678392	0	18.0988	28.8038	5.42922	0.140442	60.924	3.05198	11.472	0.387964		047_VU114-KB5	12	4	0.481083	0.00309276	0.000797448	2.22105e-05			0.0841268
047_VU114-KB5	fusion	included	0.110403	1.47271	0	66.6035	105.483	5.40289	0.0607769	76.1599	11.2313	19.4468	0.458038		049_VU114-KB5	12	4	0.53197	0.00341496	0.000511449	1.59669e-05			0.0760673
050_VU114-KB5	fusion	included	0.0683259	1.23247	0.000972201	43.3569	68.5742	5.39565	0.0661258	77.0403	7.31121	15.127	0.339466		050_VU114-KB5	12	4	0.487301	0.00315758	0.000767934	2.56596e-05			0.0734842
051_VU114-KB5	fusion		0.255435	0.702086	0.000683422	15.8967	25.8345	5.54391	0.383677	25.3005	2.68064	9.73612	0.314294		051_VU114-KB5	12		0.155702	0.00100096	0.00250188	5.77036e-05			0.102355
052_VU114-KB5	fusion	included	0.21714	0.797209	0.00159776	18.967	30.5253	5.49024	0.282484	32.0069	3.19838	10.2304	0.31301		052_VU114-KB5	12	4	0.19891	0.0013326	0.00227718	5.37957e-05			0.109538
053_VU114-KB5	fusion		0.963866	1.88768	0.00966806	50.9447	81.0613	5.42815	0.422645	21.9752	8.59073	11.6049	0.238824		053_VU114-KB5	12		0.138124	0.000873323	0.00261328	5.64694e-05			0.104361
055_VU114-KB5	fusion	included	0.174891	1.22869	0.000655006	25.0327	40.3274	5.49568	0.179589	43.5669	4.22123	8.76063	0.230025		055_VU114-KB5	12	4	0.270499	0.00174811	0.00188984	4.57381e-05			0.098938
056_VU114-KB5	fusion		0.197994	0.478776	0	11.1604	17.7103	5.41358	0.436048	23.0504	1.88196	10.0234	0.378408		056_VU114-KB5	12		0.145273	0.000949685	0.00257726	6.13387e-05			0.101623
057_VU114-KB5	fusion	included	0.244718	1.20221	0.000469785	36.5145	58.4917	5.46464	0.167402	44.4513	6.1574	13.0603	0.373512		057_VU114-KB5	12	4	0.277562	0.00177334	0.0018602	4.35756e-05			0.100183
058_VU114-KB5	fusion	included	0.191985	0.645475	0.00111854	17.6082	28.602	5.54124	0.272666	33.2829	2.96924	11.7301	0.374501		058_VU114-KB5	12	4	0.204934	0.00131535	0.00223443	5.35708e-05			0.0998541
059_VU114-KB5	fusion		0.683952	1.45757	0	37.5276	60.9254	5.53825	0.408273	22.977	6.32823	11.071	0.26718		059_VU114-KB5	12		0.141546	0.000899954	0.00257972	5.58479e-05			0.105207
061_VU114-KB5	fusion	included	0.121452	0.980288	0	23.6374	37.6014	5.42677	0.146873	50.8935	3.98595	10.3685	0.308018		061_VU114-KB5	12	4	0.320021	0.00213723	0.00164431	4.35441e-05			0.0993067
062_VU114-KB5	fusion		1.02082	1.01144	0.00224786	21.3209	34.8335	5.57327	1.05408	10.2564	3.59532	9.06428	0.211471		062_VU114-KB5	12		0.0627807	0.000398097	0.00300586	6.4508e-05			0.105216
063_VU114-KB5	fusion	included	0.0418902	0.859088	0	17.6379	27.8205	5.38097	0.123531	68.9609	2.97425	8.8283	0.23343		063_VU114-KB5	12	4	0.437369	0.002918	0.00103876	4.99138e-05			0.0574388
064_VU114-KB5	fusion	included	0.123199	0.933605	0	26.5804	42.0232	5.39349	0.130403	53.3097	4.48221	12.2424	0.433403		064_VU114-KB5	12	4	0.33729	0.00217353	0.00156333	4.04857e-05			0.0946158
065_VU114-KB5	fusion	included	0.0421006	0.715445	0.00270581	17.337	27.2643	5.36494	0.121455	68.4194	2.92352	10.42	0.318788		065_VU114-KB5	12	4	0.435234	0.00290478	0.0010569	4.87139e-05			0.0599985
		S	4.68979	24.8779	0.0204458	593.019	945.579			61.1524
Information on Analysis				Results		40(r)/39(k)	± 2s	Age	± 2s	MSWD	39Ar(k)	K/Ca	± 2s		Results			40(a)/36(a)	± 2s	40(r)/39(k)	± 2s	Age	± 2s	MSWD
								(Ma)			(%,n)											(Ma)
Sample = 049_VU114-KB5				Age Plateau		1.58566	0.00715565	5.4094	0.0325723	0.438394	76.4368	11.3689	1.4488		Inverse Isochron			300.857	3.77832	1.5812	0.0103127	5.3942	0.0412103	0.352058
Material = san							0.00451273		0.00602141	0.956421	14								0.0125585		0.00652209		0.00763973	0.979032
Location = Patmos				Full External Error					0.117467	1.78446	2σ Confidence Limit				Full External Error								0.119852
Analyst = Ina Boehm				Analytical Error					0.0243751	1	Error Magnification				Analytical Error								0.0351297
Project = PATMOS
Mass Discrimination Law = LIN				Total Fusion Age		1.59452	0.0189641	5.43958	0.0681543		20	10.25	0.0636024
Irradiation = VU114							0.0118933		0.0125293						Statistics			2σ Confidence Limit	1.8165		Convergence	0.000601875
J = 0.00186540 ± 0.00000373				Full External Error					0.132382									Error Magnification	1		Number of Iterations	3
Fcs 250-400 = 28.201 ± 0.006 Ma				Analytical Error					0.0645986									Number of Data Points	14		Calculated Line	Weighted York-2
																		Spreading Factor	0.632869
Incremental Heating			36Ar(a) [fA]	37Ar(ca) [fA]	38Ar(cl) [fA]	39Ar(k) [fA]	40Ar(r) [fA]	Age	± 2s	40Ar(r)	39Ar(k)	K/Ca	± 2s		Inverse Isochron			39(k)/40(a+r)	± 2s	36(a)/40(a+r)	± 2s			r.i.
								(Ma)		(%)	(%)
041_VU114-KB6_COMBINED	fusion	included	0.0691839	0.629968	0.0219487	53.2657	87.4334	5.30632	0.0494611	80.856	6.9315	36.3578	1.2225		041_VU114-KB6_COMBINED	12	4	0.492795	0.00303396	0.000640065	1.8464e-05			0.0303564
042_VU114-KB6_COMBINED	fusion		0.502636	1.57105	0.0248367	52.8734	87.4426	5.34619	0.222582	36.8094	6.88046	14.4716	0.330512		042_VU114-KB6_COMBINED	12		0.222616	0.00138947	0.00211628	5.0371e-05			0.0356654
043_VU114-KB6_COMBINED	fusion	included	0.0888369	0.788366	0.0133067	38.8383	63.7263	5.30422	0.0707335	70.5852	5.05407	21.1837	0.639977		043_VU114-KB6_COMBINED	12	4	0.430345	0.00269171	0.000984349	2.73177e-05			0.0350219
044_VU114-KB6_COMBINED	fusion	included	0.134205	0.607943	0.0212219	51.7497	85.1576	5.31959	0.0724607	67.979	6.73423	36.6028	1.37806		044_VU114-KB6_COMBINED	12	4	0.413251	0.00254413	0.00107171	2.71312e-05			0.0363998
045_VU114-KB6_COMBINED	fusion	included	0.137057	1.77797	0.0131597	37.7143	62.5212	5.35894	0.094476	60.4226	4.90779	9.12117	0.229263		045_VU114-KB6_COMBINED	12	4	0.364598	0.00226038	0.00132498	3.29e-05			0.0363067
047_VU114-KB6_COMBINED	fusion	included	0.209843	0.606336	0.0218679	46.7488	77.6395	5.36869	0.111379	55.3262	6.08346	33.1532	1.20309		047_VU114-KB6_COMBINED	12	4	0.33323	0.00210078	0.00149578	3.6184e-05			0.0326954
048_VU114-KB6_COMBINED	fusion	included	0.316192	2.55133	0.0236508	57.6281	95.2505	5.34309	0.1323	50.2105	7.49919	9.71262	0.219178		048_VU114-KB6_COMBINED	12	4	0.303861	0.00183746	0.00166721	3.9975e-05			0.0326001
049_VU114-KB6_COMBINED	fusion	included	0.309961	0.936575	0.0234538	55.3052	91.7786	5.36454	0.13547	49.7801	7.1969	25.3917	0.664196		049_VU114-KB6_COMBINED	12	4	0.300049	0.00187735	0.00168164	4.03468e-05			0.0355765
050_VU114-KB6_COMBINED	fusion	included	0.129419	0.716141	0.0180083	51.0457	84.2794	5.33731	0.0722428	68.5407	6.64262	30.6499	0.894543		050_VU114-KB6_COMBINED	12	4	0.41528	0.00261517	0.00105288	2.70328e-05			0.0311416
051_VU114-KB6_COMBINED	fusion	included	0.0719448	0.742583	0.0226915	58.8989	96.6899	5.30686	0.0475902	81.7878	7.66456	34.106	1.04276		051_VU114-KB6_COMBINED	12	4	0.498426	0.00304862	0.000608826	1.74764e-05			0.0302917
053_VU114-KB6_COMBINED	fusion	included	0.158186	0.617239	0.0200205	56.433	93.3658	5.34827	0.0765753	66.3852	7.34368	39.3141	1.36188		053_VU114-KB6_COMBINED	12	4	0.40139	0.00244344	0.00112513	2.83366e-05			0.0331071
054_VU114-KB6_COMBINED	fusion	included	0.146686	0.992054	0.0206971	58.4147	96.2262	5.32517	0.0700749	68.6982	7.60155	25.3195	0.739197		054_VU114-KB6_COMBINED	12	4	0.417186	0.00258646	0.0010476	2.61139e-05			0.0400019
055_VU114-KB6_COMBINED	fusion	included	0.204155	1.84707	0.0156917	35.2911	58.3465	5.34452	0.143573	48.8953	4.59246	8.2158	0.182608		055_VU114-KB6_COMBINED	12	4	0.295821	0.0018536	0.00171129	4.22532e-05			0.0447627
056_VU114-KB6_COMBINED	fusion	included	0.131712	0.85356	0.0281409	66.0381	108.912	5.33142	0.0594495	73.444	8.59359	33.2682	0.996674		056_VU114-KB6_COMBINED	12	4	0.445493	0.0027559	0.000888527	2.22512e-05			0.0367684
057_VU114-KB6_COMBINED	fusion	included	0.223069	0.539316	0.0212617	48.2124	79.7317	5.34602	0.113681	54.4717	6.27392	38.4401	1.31825		057_VU114-KB6_COMBINED	12	4	0.329475	0.00200891	0.00152441	3.67205e-05			0.0344879
		S	2.83309	15.7775	0.309958	768.458	1268.5			64.0987
Information on Analysis				Results		40(r)/39(k)	± 2s	Age	± 2s	MSWD	39Ar(k)	K/Ca	± 2s		Results			40(a)/36(a)	± 2s	40(r)/39(k)	± 2s	Age	± 2s	MSWD
								(Ma)			(%,n)											(Ma)
Sample = 051_VU114-KB6				Age Plateau Overestimated Error		1.6473	0.00617179	5.32517	0.0291428	0.292951	93.1195	12.0017	4.23077		Inverse Isochron Overestimated Error			302.556	5.08484	1.63765	0.0137522	5.29403	0.0491713	0.10959
Material = san							0.00374661		0.00547265	0.993064	14								0.0168063		0.0083975		0.00928806	0.999936
Location = Patmos				Full External Error					0.114864	1.78446	2σ Confidence Limit				Full External Error								0.120907
Analyst = Ina Boehm				Analytical Error					0.0199224	1	Error Magnification				Analytical Error								0.0443923
Project = PATMOS
Mass Discrimination Law = LIN				Total Fusion Age		1.65071	0.00854364	5.33619	0.0348546		15	20.9435	0.157103
Irradiation = VU114							0.00517573		0.00653175						Statistics			2σ Confidence Limit	1.8165		Convergence	3.73148e-05
J = 0.00176760 ± 0.00000354				Full External Error					0.116664									Error Magnification	1		Number of Iterations	3
Fcs 250-400 = 28.201 ± 0.006 Ma				Analytical Error					0.0275785									Number of Data Points	14		Calculated Line	Weighted York-2
																		Spreading Factor	0.331796
Incremental Heating			36Ar(a) [fA]	37Ar(ca) [fA]	38Ar(cl) [fA]	39Ar(k) [fA]	40Ar(r) [fA]	Age	± 2s	40Ar(r)	39Ar(k)	K/Ca	± 2s		Inverse Isochron			39(k)/40(a+r)	± 2s	36(a)/40(a+r)	± 2s			r.i.
								(Ma)		(%)	(%)
059_VU114-KB7_COMBINED	fusion	included	0.0243801	0.523868	0.0126273	36.5521	63.514	5.61674	0.0487486	89.6782	5.22771	30.0026	1.15453		059_VU114-KB7_COMBINED	12	4	0.516324	0.00331921	0.000344386	1.71555e-05			0.0215865
060_VU114-KB7_COMBINED	fusion	included	0.0558929	0.639934	0.0135325	36.3896	63.3967	5.63137	0.0612621	79.1317	5.20448	24.4518	0.744709		060_VU114-KB7_COMBINED	12	4	0.454393	0.00299608	0.000697928	2.22277e-05			0.0421483
061_VU114-KB7_COMBINED	fusion	included	0.0301935	0.417361	0.0103772	27.0366	46.9752	5.61621	0.0618339	83.8648	3.8668	27.8554	1.41491		061_VU114-KB7_COMBINED	12	4	0.482885	0.00299199	0.000539268	2.52437e-05			0.0210563
062_VU114-KB7_COMBINED	fusion	included	0.0611923	0.471354	0.0119857	29.8792	51.9746	5.62275	0.0716714	73.9643	4.27335	27.2578	0.979871		062_VU114-KB7_COMBINED	12	4	0.425362	0.00266263	0.000871137	2.70456e-05			0.0304757
063_VU114-KB7_COMBINED	fusion	included	0.0465326	0.567294	0.013165	38.1571	66.4559	5.62968	0.0526036	82.6756	5.45727	28.9225	0.930221		063_VU114-KB7_COMBINED	12	4	0.474894	0.00293721	0.000579133	1.89374e-05			0.0284555
069_VU114-KB7_COMBINED	fusion	included	0.0147209	0.365368	0.00865112	24.5218	42.4843	5.60022	0.0579556	90.584	3.50713	28.8596	1.12067		069_VU114-KB7_COMBINED	12	4	0.523083	0.00335621	0.000314016	2.44514e-05			0.0127918
070_VU114-KB7_COMBINED	fusion	included	0.0677357	0.663361	0.0166499	39.6263	68.891	5.6196	0.0611917	77.2769	5.66739	25.6863	0.788723		070_VU114-KB7_COMBINED	12	4	0.444669	0.00278438	0.0007601	2.25259e-05			0.0336901
071_VU114-KB7_COMBINED	fusion	included	0.201667	0.826723	0.0270615	53.619	93.716	5.64961	0.0970282	60.8657	7.66863	27.8886	0.734086		071_VU114-KB7_COMBINED	12	4	0.348343	0.0021137	0.00131016	3.23004e-05			0.0331842
072_VU114-KB7_COMBINED	fusion	included	0.0300969	0.459554	0.0113087	28.8608	50.2233	5.625	0.0570031	84.7882	4.1277	27.0048	1.0472		072_VU114-KB7_COMBINED	12	4	0.48744	0.00314032	0.000508317	2.18094e-05			0.0246757
073_VU114-KB7_COMBINED	fusion	included	0.0284845	0.334628	0.0110166	20.2427	35.3945	5.65185	0.0733637	80.5955	2.89512	26.012	1.28793		073_VU114-KB7_COMBINED	12	4	0.461121	0.00293134	0.000648867	3.02101e-05			0.0225764
075_VU114-KB7_COMBINED	fusion	included	0.0476681	0.600546	0.0134993	35.2801	61.4061	5.62611	0.0573296	81.1518	5.04578	25.261	0.818761		075_VU114-KB7_COMBINED	12	4	0.466434	0.00289823	0.000630214	2.14986e-05			0.0285436
076_VU114-KB7_COMBINED	fusion	included	0.0827765	0.609021	0.0132978	35.9574	62.5119	5.61953	0.07227	71.6415	5.14266	25.3878	0.825914		076_VU114-KB7_COMBINED	12	4	0.412235	0.00265366	0.000948993	2.5979e-05			0.0477642
077_VU114-KB7_COMBINED	fusion	included	0.12813	0.835371	0.0221885	49.7784	87.1692	5.66036	0.0752727	69.4761	7.11934	25.623	0.735857		077_VU114-KB7_COMBINED	12	4	0.396882	0.00251663	0.00102158	2.67247e-05			0.0312302
078_VU114-KB7_COMBINED	fusion	included	0.0334327	0.759507	0.0251953	50.5612	87.7426	5.60947	0.0444951	89.746	7.2313	28.6255	0.934897		078_VU114-KB7_COMBINED	12	4	0.517386	0.00334136	0.000342112	1.33663e-05			0.0277563
079_VU114-KB7_COMBINED	fusion	included	0.0209841	0.474957	0.014639	33.0016	57.5388	5.63574	0.0495347	90.1407	4.71991	29.8778	0.988969		079_VU114-KB7_COMBINED	12	4	0.517235	0.00320897	0.000328886	1.854e-05			0.0167386
081_VU114-KB7_COMBINED	fusion	included	0.0262842	0.527951	0.0126163	32.7923	57.16	5.63437	0.0559692	87.8903	4.68998	26.7083	1.01882		081_VU114-KB7_COMBINED	12	4	0.504439	0.00327351	0.000404326	2.18566e-05			0.0177345
082_VU114-KB7_COMBINED	fusion	included	0.0348721	0.530335	0.0115754	32.9224	57.2933	5.6252	0.0536208	84.5869	4.70859	26.6938	0.928094		082_VU114-KB7_COMBINED	12	4	0.486265	0.00325456	0.000515062	1.87035e-05			0.0301073
083_VU114-KB7_COMBINED	fusion	included	0.0409021	0.598523	0.0135734	35.9203	62.1842	5.59589	0.054275	83.5508	5.13736	25.8064	0.97794		083_VU114-KB7_COMBINED	12	4	0.482827	0.00315037	0.000549789	1.95815e-05			0.029573
084_VU114-KB7_COMBINED	fusion	included	0.0659948	0.444168	0.0118467	28.077	49.3469	5.68106	0.0777364	71.4402	4.01559	27.1814	0.970939		084_VU114-KB7_COMBINED	12	4	0.406616	0.00275544	0.000955749	2.79105e-05			0.0332067
085_VU114-KB7_COMBINED	fusion	included	0.0639895	0.501626	0.0136015	30.0229	52.4033	5.64196	0.0714544	73.2567	4.2939	25.736	0.905008		085_VU114-KB7_COMBINED	12	4	0.419854	0.00277873	0.000894858	2.59518e-05			0.0337921
		S	1.10593	11.1515	0.288409	699.199	1217.78			80.3153
Information on Analysis				Results		40(r)/39(k)	± 2s	Age	± 2s	MSWD	39Ar(k)	K/Ca	± 2s		Results			40(a)/36(a)	± 2s	40(r)/39(k)	± 2s	Age	± 2s	MSWD
								(Ma)			(%,n)											(Ma)
Sample = 078_VU114-KB7				Age Plateau		1.7404	0.0041323	5.62567	0.0261283	0.366882	100	26.7897	0.713525		Inverse Isochron Overestimated Error			303.183	6.31061	1.73452	0.00903862	5.60671	0.0367753	0.266877
Material = san							0.00237434		0.00464447	0.994368	20								0.0208145		0.00521101		0.00655917	0.999133
Location = Patmos				Full External Error					0.120241	1.64889	2σ Confidence Limit				Full External Error								0.122617
Analyst = Ina Boehm				Analytical Error					0.0133368	1	Error Magnification				Analytical Error								0.0291719
Project = PATMOS
Mass Discrimination Law = LIN				Total Fusion Age		1.74168	0.00468336	5.62982	0.027093		20	26.9611	0.210345
Irradiation = VU114							0.00268899		0.00481241						Statistics			2σ Confidence Limit	1.66667		Convergence	0.000524381
J = 0.00176760 ± 0.00000354				Full External Error					0.120538									Error Magnification	1		Number of Iterations	2
Fcs 250-400 = 28.201 ± 0.006 Ma				Analytical Error					0.0151152									Number of Data Points	20		Calculated Line	Weighted York-2
																		Spreading Factor	0.30309
Incremental Heating			36Ar(a) [A]	37Ar(ca) [A]	38Ar(cl) [A]	39Ar(k) [A]	40Ar(r) [A]	Age	± 2s	40Ar(r)	39Ar(k)	K/Ca	± 2s		Inverse Isochron			39(k)/40(a+r)	± 2s	36(a)/40(a+r)	± 2s			r.i.
								(Ma)		(%)	(%)
003_VU114-KB8A_COMBINED	fusion	included	0.0249161	0.418194	0.0160297	10.8561	18.7551	5.85346	0.111451	71.5752	7.10316	11.1626	0.305841		003_VU114-KB8A_COMBINED	12	4	0.414449	0.00203701	0.00095121	4.37369e-05			0.0348656
022_VU114-KB8A_COMBINED	fusion		0.0199192	0.373064	0.0145638	9.46027	16.671	5.9705	0.120576	73.68	6.18986	10.9041	0.340426		022_VU114-KB8A_COMBINED	12		0.418262	0.00252269	0.000880677	4.6571e-05			0.0720412
036_VU114-KB8A_COMBINED	fusion	included	0.025245	0.169134	0.0108969	7.86131	13.5942	5.85903	0.155576	64.3114	5.14366	19.9863	0.96612		036_VU114-KB8A_COMBINED	12	4	0.372021	0.00271355	0.00119467	5.45522e-05			0.0320545
056_VU114-KB8A_COMBINED	fusion	included	0.0221213	0.729063	0.019664	10.9614	18.9549	5.85899	0.10587	74.1328	7.17205	6.46501	0.121155		056_VU114-KB8A_COMBINED	12	4	0.428859	0.0019643	0.000865483	4.29953e-05			0.0406077
078_VU114-KB8A_COMBINED	fusion		0.0335121	0.380994	0.0129232	7.90563	13.9551	5.98063	0.151716	58.2256	5.17266	8.92249	0.27096		078_VU114-KB8A_COMBINED	12		0.329945	0.002051	0.00139864	4.7425e-05			0.0454779
100_VU114-KB8A_COMBINED	fusion	included	0.0281294	1.30257	0.03491	22.9719	39.3709	5.80699	0.0602008	82.3849	15.0305	7.58337	0.140752		100_VU114-KB8A_COMBINED	12	4	0.480894	0.00221211	0.00058886	2.5351e-05			0.0251543
124_VU114-KB8A_COMBINED	fusion	included	0.0203957	0.246628	0.016439	10.4564	18.2274	5.90614	0.0984927	74.9305	6.84162	18.2309	0.73773		124_VU114-KB8A_COMBINED	12	4	0.430007	0.00190498	0.000838752	4.01182e-05			0.0251155
148_VU114-KB8A_COMBINED	fusion	included	0.0334265	0.400346	0.0221936	13.7199	23.7395	5.86255	0.0910365	70.3786	8.97692	14.7361	0.40981		148_VU114-KB8A_COMBINED	12	4	0.406885	0.00183269	0.000991317	3.46799e-05			0.0344624
172_VU114-KB8A_COMBINED	fusion	included	0.00986626	0.0639168	0.00594608	3.96466	6.92664	5.91937	0.264977	70.1381	2.59408	26.6722	4.0395		172_VU114-KB8A_COMBINED	12	4	0.401594	0.00440893	0.000999387	0.000101464			0.026245
192_VU114-KB8A_COMBINED	fusion		0.0224944	0.305929	0.0135452	9.25818	15.6319	5.72096	0.117046	69.9233	6.05763	13.0129	0.550523		192_VU114-KB8A_COMBINED	12		0.414277	0.0022614	0.00100656	4.57495e-05			0.0374337
216_VU114-KB8A_COMBINED	fusion		0.0275399	0.261391	0.00916954	7.74925	13.0866	5.72202	0.156579	61.3945	5.07034	12.7479	0.503602		216_VU114-KB8A_COMBINED	12		0.363662	0.00280423	0.00129241	5.3348e-05			0.0433956
238_VU114-KB8A_COMBINED	fusion	included	0.0201356	0.218965	0.0110651	7.63924	13.2595	5.88087	0.149013	68.7814	4.99836	15.0018	0.636168		238_VU114-KB8A_COMBINED	12	4	0.396407	0.00185436	0.00104485	5.70943e-05			0.0326183
254_VU114-KB8A_COMBINED	fusion	included	0.0303349	0.712181	0.024766	15.4335	26.5086	5.8196	0.0760064	74.507	10.0981	9.31842	0.210744		254_VU114-KB8A_COMBINED	12	4	0.433947	0.0017846	0.000852933	3.05987e-05			0.0344394
272_VU114-KB8A_COMBINED	fusion	included	0.0192062	0.0684948	0.00896105	5.33383	9.27268	5.89018	0.194509	61.7706	3.48993	33.485	4.34819		272_VU114-KB8A_COMBINED	12	4	0.355426	0.00278359	0.00127983	6.59742e-05			0.0296525
282_VU114-KB8A_COMBINED	fusion		0.0200717	0.50518	0.0145383	9.26342	15.7271	5.75248	0.116937	72.3828	6.06106	7.88485	0.252523		282_VU114-KB8A_COMBINED	12		0.426499	0.00358573	0.000924124	4.45537e-05			0.0185867
		S	0.357314	6.15606	0.235612	152.835	263.681			71.2911
Information on Analysis				Results		40(r)/39(k)	± 2s	Age	± 2s	MSWD	39Ar(k)	K/Ca	± 2s		Results			40(a)/36(a)	± 2s	40(r)/39(k)	± 2s	Age	± 2s	MSWD
								(Ma)			(%,n)											(Ma)
Sample = 192_VU114-KB8A				Age Plateau		1.72508	0.00949393	5.84491	0.0501481	0.513288	71.4484	8.1803	1.7331		Inverse Isochron			310.388	16.414	1.70165	0.0338732	5.76564	0.120725	0.30234
Material = biotite							0.00550346		0.00857979	0.86613	10								0.0528821		0.0199061		0.0209387	0.965413
Location = Patmos				Full External Error					0.131845	1.94281	2σ Confidence Limit				Full External Error								0.17042
Analyst = Ina Boehm				Analytical Error					0.0321159	1	Error Magnification				Analytical Error								0.114591
Project = VU114
Mass Discrimination Law = LIN				Total Fusion Age		1.72527	0.00870581	5.84553	0.0484872		15	10.6755	0.0867644
Irradiation = VU114							0.00504607		0.00829474						Statistics			2σ Confidence Limit	2		Convergence	9.97276e-05
J = 0.00185290 ± 0.00000611				Full External Error					0.131235									Error Magnification	1		Number of Iterations	3
Dra = 28.201 ± 0.006 Ma				Analytical Error					0.0294499									Number of Data Points	10		Calculated Line	Weighted York-2
																		Spreading Factor	0.213502
Incremental Heating			36Ar(a) [A]	37Ar(ca) [A]	38Ar(cl) [A]	39Ar(k) [A]	40Ar(r) [A]	Age	± 2s	40Ar(r)	39Ar(k)	K/Ca	± 2s		Inverse Isochron			39(k)/40(a+r)	± 2s	36(a)/40(a+r)	± 2s			r.i.
								(Ma)		(%)	(%)
021_VU114-KB9A_COMBINED	fusion	included	0.0790843	0.650894	0.00748279	30.3582	54.2238	6.02795	0.0592562	69.6415	7.85531	20.0555	0.321296		021_VU114-KB9A_COMBINED	12	4	0.390031	0.00143596	0.00101605	2.08626e-05			0.0400322
034_VU114-KB9A_COMBINED	fusion	included	0.114431	0.618844	0.0155662	29.0331	51.9359	6.0371	0.0760942	60.3027	7.51244	20.1735	0.442021		034_VU114-KB9A_COMBINED	12	4	0.337201	0.00146686	0.00132904	2.30939e-05			0.0798788
054_VU114-KB9A_COMBINED	fusion		0.101511	0.273348	0.00362937	11.9318	20.652	5.8416	0.163828	40.5185	3.08742	18.7698	0.806823		054_VU114-KB9A_COMBINED	12		0.234145	0.00100166	0.00199201	3.69503e-05			0.0876807
077_VU114-KB9A_COMBINED	fusion	included	0.0350112	0.534332	0.00999976	24.364	42.8916	5.94141	0.0550237	80.3733	6.3043	19.6068	0.463668		077_VU114-KB9A_COMBINED	12	4	0.456729	0.00169121	0.000656321	2.2559e-05			0.0307851
097_VU114-KB9A_COMBINED	fusion	included	0.109704	0.597858	0.010006	30.651	53.7074	5.91369	0.0670434	62.0989	7.93108	22.0453	0.496771		097_VU114-KB9A_COMBINED	12	4	0.354508	0.00133245	0.00126883	2.17381e-05			0.0515001
098_VU114-KB9A_COMBINED	fusion	included	0.0418788	0.653378	0.00998174	28.9772	51.11	5.95269	0.0490499	80.3133	7.49798	19.0704	0.426441		098_VU114-KB9A_COMBINED	12	4	0.455521	0.00192022	0.000658333	1.85954e-05			0.0401775
122_VU114-KB9A_COMBINED	fusion	included	0.039934	0.515267	0.00728011	21.3075	37.8686	5.99798	0.0615825	76.0267	5.51341	17.7815	0.457002		122_VU114-KB9A_COMBINED	12	4	0.427937	0.00178486	0.000802028	2.33851e-05			0.0478355
146_VU114-KB9A_COMBINED	fusion	included	0.063171	0.709804	0.0120288	32.0566	56.895	5.98986	0.0583346	75.0763	8.29478	19.4199	0.343725		146_VU114-KB9A_COMBINED	12	4	0.42316	0.0016529	0.000833882	2.20605e-05			0.0367225
166_VU114-KB9A_COMBINED	fusion	included	0.134259	0.448531	0.0115547	20.6431	36.247	5.92603	0.109333	47.4753	5.3415	19.7902	0.532414		166_VU114-KB9A_COMBINED	12	4	0.270441	0.00100979	0.0017589	2.82477e-05			0.0515403
190_VU114-KB9A_COMBINED	fusion	included	0.0466279	0.810875	0.0169711	36.2218	64.4512	6.00508	0.0482185	82.2044	9.37255	19.2081	0.317721		190_VU114-KB9A_COMBINED	12	4	0.462175	0.00205888	0.000594952	1.7926e-05			0.0394269
214_VU114-KB9A_COMBINED	fusion	included	0.034445	0.645257	0.00756385	28.4047	50.5957	6.01146	0.0512947	83.0745	7.34985	18.929	0.359241		214_VU114-KB9A_COMBINED	12	4	0.466572	0.00200972	0.000565789	1.99848e-05			0.0448171
237_VU114-KB9A_COMBINED	fusion		0.0563522	0.14938	0.00433413	8.31531	14.4453	5.86303	0.166719	46.1851	2.15162	23.9361	1.62742		237_VU114-KB9A_COMBINED	12		0.265922	0.00148042	0.00180213	4.27288e-05			0.0380592
253_VU114-KB9A_COMBINED	fusion	included	0.0234763	0.564834	0.00744375	27.9883	49.4461	5.96236	0.0798436	87.5473	7.2421	21.3071	0.546135		253_VU114-KB9A_COMBINED	12	4	0.495762	0.00386304	0.000415841	3.01323e-05			0.0849771
270_VU114-KB9A_COMBINED	fusion		0.074506	0.617063	0.0129076	29.8092	55.3171	6.26233	0.0571284	71.2966	7.71327	20.7726	0.56061		270_VU114-KB9A_COMBINED	12		0.38433	0.00145893	0.000960604	1.93941e-05			0.0402684
281_VU114-KB9A_COMBINED	fusion	included	0.0360943	0.584931	0.00721267	26.4049	46.4659	5.93903	0.0497648	81.142	6.83239	19.411	0.354241		281_VU114-KB9A_COMBINED	12	4	0.461284	0.00173624	0.000630554	1.99949e-05			0.0353553
		S	0.990485	8.3746	0.143963	386.467	686.253			73.773
Information on Analysis				Results		40(r)/39(k)	± 2s	Age	± 2s	MSWD	39Ar(k)	K/Ca	± 2s		Results			40(a)/36(a)	± 2s	40(r)/39(k)	± 2s	Age	± 2s	MSWD
								(Ma)			(%,n)											(Ma)
Sample = 054_VU114-KB9A				Age Plateau		1.77115	0.00662204	5.97745	0.0452676	1.71153	87.0477	19.5993	0.543648		Inverse Isochron Error Chron			298.257	6.38	1.77177	0.0141099	5.97953	0.0617464	1.89526
Material = sanidine							0.00373884		0.00757307	0.0642728	12								0.021391		0.00796373		0.0103263	0.0408693
Location = Patmos				Full External Error					0.13266	1.8528	2σ Confidence Limit				Full External Error								0.139187
Analyst = Ina Boehm				Analytical Error					0.0223123	1.30826	Error Magnification				Analytical Error								0.0475417
Project = VU114
Mass Discrimination Law = LIN				Total Fusion Age		1.77571	0.00526452	5.99282	0.043289		15	19.8434	0.118423
Irradiation = VU114							0.00296474		0.00722348						Statistics			2σ Confidence Limit	1.89443		Convergence	5.30233e-05
J = 0.00184570 ± 0.00000609				Full External Error					0.1323									Error Magnification	1.37668		Number of Iterations	3
Dra = 28.201 ± 0.006 Ma				Analytical Error					0.0177381									Number of Data Points	12		Calculated Line	Weighted York-2
																		Spreading Factor	0.399216
Incremental Heating			36Ar(a) [fA]	37Ar(ca) [fA]	38Ar(cl) [fA]	39Ar(k) [fA]	40Ar(r) [fA]	Age	± 2s	40Ar(r)	39Ar(k)	K/Ca	± 2s		Inverse Isochron			39(k)/40(a+r)	± 2s	36(a)/40(a+r)	± 2s			r.i.
								(Ma)		(%)	(%)
087_VU114-KB10_COMBINED	fusion	included	0.36616	2.46009	0.0318455	74.0807	152.22	6.64008	0.122641	58.1871	10.9828	12.9486	0.288368		087_VU114-KB10_COMBINED	12	4	0.283247	0.00171307	0.00140001	3.35759e-05			0.0331462
088_VU114-KB10_COMBINED	fusion	included	0.197187	1.58555	0.0188149	44.0479	90.2665	6.6223	0.116105	60.5098	6.53029	11.9457	0.2833		088_VU114-KB10_COMBINED	12	4	0.295349	0.00179872	0.00132217	3.28755e-05			0.0333322
089_VU114-KB10_COMBINED	fusion	included	0.188095	2.26385	0.0292705	69.7836	142.525	6.60008	0.0778152	71.7134	10.3457	13.2548	0.284297		089_VU114-KB10_COMBINED	12	4	0.351231	0.00219327	0.000946709	2.35315e-05			0.0320737
090_VU114-KB10_COMBINED	fusion	included	0.159581	1.69572	0.0263239	60.7747	124.145	6.6011	0.0765335	72.2437	9.0101	15.4112	0.377494		090_VU114-KB10_COMBINED	12	4	0.353774	0.00214962	0.000928935	2.34068e-05			0.0326302
091_VU114-KB10_COMBINED	fusion		-0.00690769	-0.0173233	0	0.000333714	0.0880628	701.104	26282.9	-4.46046	4.94745e-05	-0.00828345	0.372951		091_VU114-KB10_COMBINED	12		-0.000169029	0.00760953	0.00349881	0.000461841			6.01767e-05
093_VU114-KB10_COMBINED	fusion		4.24938	4.15155	0.0945498	136.723	243.134	5.74798	0.705837	16.0809	20.2698	14.1612	0.455706		093_VU114-KB10_COMBINED	12		0.0904355	0.000553945	0.00281075	6.5774e-05			0.040806
094_VU114-KB10_COMBINED	fusion	included	0.245768	1.5817	0.0240045	53.3911	105.743	6.40053	0.1151	59.0198	7.91546	14.5149	0.52463		094_VU114-KB10_COMBINED	12	4	0.298076	0.00185039	0.00137209	3.28633e-05			0.0371596
095_VU114-KB10_COMBINED	fusion	included	0.232444	1.86458	0.0291635	58.0747	115.813	6.44464	0.10322	62.5132	8.60981	13.3929	0.427909		095_VU114-KB10_COMBINED	12	4	0.313559	0.00195336	0.00125502	3.04337e-05			0.032676
096_VU114-KB10_COMBINED	fusion	included	0.13108	1.67365	0.0200126	44.9475	90.3856	6.49854	0.0854869	69.7638	6.66365	11.548	0.304759		096_VU114-KB10_COMBINED	12	4	0.347029	0.00220831	0.00101204	2.63271e-05			0.0383064
097_VU114-KB10_COMBINED	fusion	included	0.367293	3.00917	0.0461888	93.5702	188.145	6.49798	0.100313	63.1604	13.8722	13.3708	0.300399		097_VU114-KB10_COMBINED	12	4	0.3142	0.00197945	0.00123334	2.92064e-05			0.0431546
103_VU114-KB10_COMBINED	fusion	included	0.162054	1.09679	0.0177501	37.726	75.5777	6.47407	0.113592	60.9532	5.59304	14.7906	0.38357		103_VU114-KB10_COMBINED	12	4	0.304339	0.00192405	0.0013073	3.29834e-05			0.0309634
104_VU114-KB10_COMBINED	fusion		0.000580262	0.0319354	0.00159038	0.871005	1.80048	6.67988	1.14725	91.1879	0.12913	11.7278	4.64887		104_VU114-KB10_COMBINED	12		0.4413	0.0132316	0.000293993	0.000516946			0.00794051
105_VU114-KB10_COMBINED	fusion		-0.000438611	0.0125671	0.000913831	0.32944	0.916973	8.98891	2.79333	116.618	0.0488408	11.2722	11.4296		105_VU114-KB10_COMBINED	12		0.419123	0.0328482	-0.000558014	0.00118423			0.0200605
106_VU114-KB10_COMBINED	fusion		-0.000166834	-1.33404e-05	0.0011107	0.19713	0.552306	9.04788	5.09993	109.875	0.0292253	-6354.06	6.47032e+06		106_VU114-KB10_COMBINED	12		0.392302	0.0477464	-0.000332012	0.0020362			0.0107424
		S	6.29211	21.4098	0.341539	674.517	1331.31			64.2294
Information on Analysis				Results		40(r)/39(k)	± 2s	Age	± 2s	MSWD	39Ar(k)	K/Ca	± 2s		Results			40(a)/36(a)	± 2s	40(r)/39(k)	± 2s	Age	± 2s	MSWD
								(Ma)			(%,n)											(Ma)
Sample = 093_VU114-KB10				Age Plateau Error Mean		2.02334	0.0165487	6.53862	0.0594256	2.73464	79.523	13.1791	0.813646		Inverse Isochron Error Chron			291.179	20.0223	2.0496	0.0725044	6.62335	0.235367	2.91967
Material = san							0.00817892		0.00908841	0.00514865	9								0.0687629		0.0353748		0.0355359	0.00469794
Location = Patmos				Full External Error					0.148772	2	2σ Confidence Limit				Full External Error								0.272917
Analyst = Ina Boehm				Analytical Error					0.0533834	1.65367	Error Magnification				Analytical Error								0.233876
Project = PATMOS
Mass Discrimination Law = LIN				Total Fusion Age		1.97373	0.0451833	6.37858	0.147975		14	13.5472	0.128349
Irradiation = VU114							0.0228924		0.0231988						Statistics			2σ Confidence Limit	2.06904		Convergence	0.00052451
J = 0.00176760 ± 0.00000354				Full External Error					0.198998									Error Magnification	1.7087		Number of Iterations	3
Fcs 250-400 = 28.201 ± 0.006 Ma				Analytical Error					0.145767									Number of Data Points	9		Calculated Line	Weighted York-2
																		Spreading Factor	0.144553
Incremental Heating			36Ar(a) [fA]	37Ar(ca) [fA]	38Ar(cl) [fA]	39Ar(k) [fA]	40Ar(r) [fA]	Age	± 2s	40Ar(r)	39Ar(k)	K/Ca	± 2s		Inverse Isochron			39(k)/40(a+r)	± 2s	36(a)/40(a+r)	± 2s			r.i.
								(Ma)		(%)	(%)
08_VU114-KB11	fusion	included	-0.0523742	0.820101	0	30.1276	57.2425	6.48125	0.188708	137.498	5.14536	15.7967	0.580936		001_VU114-KB11	12		0.245423	0.00221128	0.00174268	5.9557e-05			0.0534384
001_VU114-KB11	fusion		0.189645	0.952746	0	26.7079	52.2036	6.66722	0.257401	47.9606	4.56131	12.054	0.409428		003_VU114-KB11	12		0.203495	0.00182262	0.00201078	6.9483e-05			0.0499867
003_VU114-KB11	fusion		0.201482	0.657445	0	20.3904	40.0465	6.69913	0.355771	39.9592	3.48238	13.3363	0.534616		004_VU114-KB11	12		0.227982	0.00202978	0.0018242	6.25275e-05			0.0483554
004_VU114-KB11	fusion		0.281715	1.02549	0	35.2077	70.3229	6.8128	0.288621	45.5276	6.01295	14.763	0.509312		005_VU114-KB11	12		0.288116	0.00259342	0.00145778	5.00033e-05			0.0524984
005_VU114-KB11	fusion		0.186068	0.970808	0	36.7745	72.0855	6.68623	0.189633	56.4625	6.28055	16.2885	0.575222		006_VU114-KB11	12	4	0.418849	0.00376028	0.000622513	2.67805e-05			0.0413407
006_VU114-KB11	fusion	included	0.0623343	1.23045	0	41.9407	81.5228	6.63027	0.0899119	81.3849	7.16285	14.6568	0.434079		007_VU114-KB11	12	4	0.31779	0.00286109	0.00127371	4.38903e-05			0.050647
007_VU114-KB11	fusion	included	0.169963	1.36285	0.000952962	42.4058	82.6954	6.65184	0.155584	61.9553	7.24228	13.3797	0.434677		009_VU114-KB11	12	4	0.383956	0.0035201	0.000873066	3.71638e-05			0.041582
009_VU114-KB11	fusion	included	0.0633926	0.756497	0	27.8787	53.6827	6.56836	0.117518	73.9093	4.76127	15.8465	0.540096		010_VU114-KB11	12	4	0.430405	0.00385541	0.000561465	3.08829e-05			0.0321054
010_VU114-KB11	fusion	included	0.0375767	0.846146	0	28.8054	55.7073	6.59676	0.0953087	83.2061	4.91953	14.6385	0.49878		011_VU114-KB11	12	4	0.405388	0.0036803	0.000716027	3.64443e-05			0.0369069
011_VU114-KB11	fusion	included	0.0493698	0.968295	0	27.9514	54.2099	6.61552	0.111195	78.5949	4.77369	12.4126	0.441441		012_VU114-KB11	12	4	0.385714	0.00349143	0.000843693	4.00781e-05			0.0392661
012_VU114-KB11	fusion	included	0.0560868	0.876429	0	25.6414	49.7325	6.61588	0.123482	74.7859	4.37918	12.5804	0.416423		013_VU114-KB11	12	4	0.393096	0.00355904	0.000804345	3.85328e-05			0.0389468
013_VU114-KB11	fusion	included	0.0518789	0.752191	0	25.3541	49.0094	6.59362	0.118162	75.9598	4.3301	14.494	0.509898		07_VU114-KB11	12	4	0.750886	0.0108894	-0.00143436	0.000229235			0.0620405
07_VU114-KB11	fusion	included	-0.0322223	0.538054	0	16.8683	32.0849	6.48833	0.318666	142.732	2.88086	13.4808	0.515706		08_VU114-KB11	12	4	0.724123	0.00815293	-0.00125882	0.000126827			0.0545334
09_VU114-KB11	fusion	included	-0.0608958	0.815632	0	27.0172	51.4541	6.49655	0.209906	154.534	4.61414	14.2434	0.496421		09_VU114-KB11	12	4	0.811986	0.0101892	-0.00183019	0.000159928			0.0821962
10_VU114-KB11	fusion	included	0.0379198	1.17718	0	32.0361	61.3851	6.53615	0.190345	84.3967	5.47129	11.7022	0.339253		10_VU114-KB11	12	4	0.440623	0.00441141	0.000521547	7.6804e-05			0.0240561
11_VU114-KB11	fusion	included	-0.0223125	0.95585	0	33.2292	63.6631	6.53532	0.170776	111.631	5.67505	14.9485	0.52855		11_VU114-KB11	12	4	0.582953	0.00626439	-0.000391438	9.00886e-05			0.0197179
13_VU114-KB11	fusion	included	-0.0269167	0.728792	0	24.8145	47.7636	6.56578	0.222408	120.164	4.23795	14.641	0.580646		13_VU114-KB11	12	4	0.624621	0.00712957	-0.000677537	0.000130054			0.0296678
14_VU114-KB11	fusion	included	-0.00332956	0.960685	0	36.4978	70.3236	6.57249	0.160702	101.388	6.23328	16.3363	0.520575		14_VU114-KB11	12	4	0.526439	0.00530519	-4.80251e-05	7.59285e-05			0.00230453
15_VU114-KB11	fusion	included	0.00707029	1.54385	0	45.8822	88.8373	6.60453	0.13318	97.6366	7.836	12.7793	0.433104		15_VU114-KB11	12	4	0.504487	0.00491645	7.77397e-05	5.77621e-05			0.00411283
		S	1.19645	17.9395	0.000952962	585.531	1133.97			98.6518
Information on Analysis				Results		40(r)/39(k)	± 2s	Age	± 2s	MSWD	39Ar(k)	K/Ca	± 2s		Results			40(a)/36(a)	± 2s	40(r)/39(k)	± 2s	Age	± 2s	MSWD
								(Ma)			(%,n)											(Ma)
Sample = 08_VU114-KB11				Age Plateau		1.93225	0.0103614	6.59105	0.0440143	0.38412	79.6628	13.8005	0.739046		Inverse Isochron Overestimated Error			305.124	7.82073	1.92446	0.0142829	6.56456	0.0552469	0.171098
Material = san							0.00536236		0.00667788	0.979831	15								0.0256313		0.00742176		0.00841594	0.99959
Location = Patmos				Full External Error					0.144354	1.75593	2σ Confidence Limit				Full External Error								0.147654
Analyst = Ina Boehm				Analytical Error					0.03528	1	Error Magnification				Analytical Error								0.0486333
Project = PATMOS
Mass Discrimination Law = LIN				Total Fusion Age		1.93666	0.0125031	6.60607	0.0500809		19	14.0349	0.112374
Irradiation = VU114							0.006456		0.00758104						Statistics			2σ Confidence Limit	1.78446		Convergence	0.000264789
J = 0.00186580 ± 0.00000373				Full External Error					0.146612									Error Magnification	1		Number of Iterations	3
Fcs 250-400 = 28.201 ± 0.006 Ma				Analytical Error					0.0425719									Number of Data Points	15		Calculated Line	Weighted York-2
																		Spreading Factor	0.951062
Incremental Heating			36Ar(a) [fA]	37Ar(ca) [fA]	38Ar(cl) [fA]	39Ar(k) [fA]	40Ar(r) [fA]	Age	± 2s	40Ar(r)	39Ar(k)	K/Ca	± 2s		Inverse Isochron			39(k)/40(a+r)	± 2s	36(a)/40(a+r)	± 2s			r.i.
								(Ma)		(%)	(%)
114_VU114-KB12_COMBINED	fusion	included	0.031483	0.694095	0.0112954	29.8698	52.2423	5.65345	0.0575402	84.7161	3.48972	18.5047	0.567281		108_VU114-KB12_COMBINED	12	4	0.501271	0.00317491	0.000398933	1.69811e-05			0.0212274
108_VU114-KB12_COMBINED	fusion	included	0.0336873	0.941725	0.0143097	42.3291	74.3858	5.68029	0.049073	88.0515	4.94535	19.3278	0.545532		109_VU114-KB12_COMBINED	12	4	0.449563	0.00285716	0.000712692	2.04555e-05			0.0291943
109_VU114-KB12_COMBINED	fusion	included	0.0571377	0.842522	0.0137879	36.0422	63.1126	5.66013	0.0575698	78.6914	4.21085	18.395	0.578348		110_VU114-KB12_COMBINED	12	4	0.484938	0.00307435	0.000497649	1.81554e-05			0.0314486
110_VU114-KB12_COMBINED	fusion	included	0.0362564	0.776293	0.0132224	35.3303	62.0307	5.67517	0.0517452	85.1067	4.12768	19.57	0.624917		111_VU114-KB12_COMBINED	12	4	0.468991	0.00290187	0.000597247	1.77606e-05			0.0281328
111_VU114-KB12_COMBINED	fusion	included	0.0509199	0.931748	0.0185578	39.985	70.055	5.66321	0.0513222	82.1355	4.67149	18.453	0.580568		112_VU114-KB12_COMBINED	12	4	0.528616	0.00325862	0.000225255	1.42796e-05			0.0144168
112_VU114-KB12_COMBINED	fusion	included	0.0164796	0.923099	0.0150433	38.6733	68.2395	5.70349	0.0440096	93.2324	4.51825	18.0149	0.493173		114_VU114-KB12_COMBINED	12	4	0.48457	0.0031497	0.00051074	2.18265e-05			0.0240045
115_VU114-KB12_COMBINED	fusion	included	0.0375473	0.549799	0.0103753	26.0229	45.7055	5.67718	0.0630799	80.2724	3.04028	20.3526	0.750878		115_VU114-KB12_COMBINED	12	4	0.457219	0.00292071	0.000659701	2.38968e-05			0.0338204
116_VU114-KB12_COMBINED	fusion	included	0.0372141	0.946292	0.0151553	42.8799	75.7361	5.70906	0.0470804	87.1696	5.00971	19.4849	0.536125		116_VU114-KB12_COMBINED	12	4	0.493743	0.00312056	0.000428504	1.50204e-05			0.0267159
117_VU114-KB12_COMBINED	fusion	included	0.0430007	1.01137	0.0156323	44.8613	78.8525	5.6815	0.049152	85.9621	5.24119	19.0735	0.530252		117_VU114-KB12_COMBINED	12	4	0.489267	0.00310548	0.000468975	1.64894e-05			0.0261914
118_VU114-KB12_COMBINED	fusion	included	0.116983	0.75278	0.0137328	35.6677	62.8357	5.69441	0.0919174	64.2539	4.16709	20.3739	0.70762		118_VU114-KB12_COMBINED	12	4	0.364842	0.00222884	0.00119661	3.17015e-05			0.0325817
120_VU114-KB12_COMBINED	fusion	included	0.0930944	0.958836	0.0173679	41.9691	73.8789	5.68995	0.0681112	72.6373	4.9033	18.8215	0.508098		120_VU114-KB12_COMBINED	12	4	0.412785	0.00256875	0.000915624	2.43454e-05			0.0348395
121_VU114-KB12_COMBINED	fusion	included	0.135061	0.767401	0.0117157	35.4703	62.5986	5.70448	0.102202	60.8031	4.14403	19.8752	0.573983		121_VU114-KB12_COMBINED	12	4	0.344631	0.00214654	0.00131226	3.37146e-05			0.0363801
122_VU114-KB12_COMBINED	fusion	included	0.0408599	1.01354	0.0197957	43.2342	76.477	5.71767	0.0486683	86.2069	5.0511	18.3424	0.504006		122_VU114-KB12_COMBINED	12	4	0.487551	0.00301855	0.000460776	1.641e-05			0.0279372
123_VU114-KB12_COMBINED	fusion	included	0.267421	1.24298	0.0246009	59.4991	104.87	5.69718	0.111329	56.7595	6.95135	20.5833	0.525959		123_VU114-KB12_COMBINED	12	4	0.322119	0.00195994	0.00144778	3.48635e-05			0.0331601
124_VU114-KB12_COMBINED	fusion	included	0.0292122	0.935141	0.0141684	42.2479	74.5964	5.70727	0.0477784	89.4932	4.93587	19.4266	0.535184		124_VU114-KB12_COMBINED	12	4	0.507068	0.00318206	0.00035061	1.62236e-05			0.0234512
126_VU114-KB12_COMBINED	fusion		0.300681	1.37055	0.0240317	59.3565	105.822	5.76258	0.122481	54.089	6.93468	18.6227	0.451164		126_VU114-KB12_COMBINED	12		0.303469	0.00186253	0.00153728	3.63911e-05			0.0369677
127_VU114-KB12_COMBINED	fusion	included	0.144252	1.31156	0.0253544	57.9397	101.993	5.69001	0.070929	70.2864	6.76916	18.9957	0.478752		127_VU114-KB12_COMBINED	12	4	0.399416	0.00244869	0.000994423	2.50299e-05			0.0349324
128_VU114-KB12_COMBINED	fusion	included	0.0419901	1.32768	0.0195636	57.6891	101.751	5.70114	0.0441802	88.992	6.73988	18.684	0.701519		128_VU114-KB12_COMBINED	12	4	0.504771	0.0031361	0.000367408	1.34223e-05			0.0234933
129_VU114-KB12_COMBINED	fusion	included	0.0278104	1.21581	0.0236661	55.4536	97.9351	5.70853	0.0413236	92.1431	6.4787	19.6125	0.469272		129_VU114-KB12_COMBINED	12	4	0.521974	0.00319737	0.000261775	1.15971e-05			0.0196656
130_VU114-KB12_COMBINED	fusion	included	0.0273602	0.730861	0.0145115	31.4156	55.4707	5.70734	0.0557499	87.1271	3.67032	18.4833	0.570491		130_VU114-KB12_COMBINED	12	4	0.493651	0.00317711	0.000429926	2.11072e-05			0.0207241
		S	1.56845	19.2441	0.335888	855.937	1508.59			80.739
Information on Analysis				Results		40(r)/39(k)	± 2s	Age	± 2s	MSWD	39Ar(k)	K/Ca	± 2s		Results			40(a)/36(a)	± 2s	40(r)/39(k)	± 2s	Age	± 2s	MSWD
								(Ma)			(%,n)											(Ma)
Sample = 114_VU114-KB12				Age Plateau		1.76096	0.00387503	5.69202	0.0259456	0.491437	93.0653	19.1253	0.335755		Inverse Isochron			297.008	5.09874	1.7627	0.00686151	5.69766	0.0317517	0.498668
Material = san							0.00220053		0.00455825	0.963207	19								0.017167		0.00389261		0.00557276	0.955247
Location = Patmos				Full External Error					0.121552	1.66667	2σ Confidence Limit				Full External Error								0.123035
Analyst = Ina Boehm				Analytical Error					0.012506	1	Error Magnification				Analytical Error								0.0221443
Project = PATMOS
Mass Discrimination Law = LIN				Total Fusion Age		1.7625	0.00515299	5.69701	0.0281824		20	19.1255	0.126421
Irradiation = VU114							0.00292368		0.00494688						Statistics			2σ Confidence Limit	1.68599		Convergence	0.000247377
J = 0.00176760 ± 0.00000354				Full External Error					0.12215									Error Magnification	1		Number of Iterations	3
Fcs 250-400 = 28.201 ± 0.006 Ma				Analytical Error					0.0166303									Number of Data Points	19		Calculated Line	Weighted York-2
																		Spreading Factor	0.363993
Incremental Heating			36Ar(a) [fA]	37Ar(ca) [fA]	38Ar(cl) [fA]	39Ar(k) [fA]	40Ar(r) [fA]	Age	± 2s	40Ar(r)	39Ar(k)	K/Ca	± 2s		Inverse Isochron			39(k)/40(a+r)	± 2s	36(a)/40(a+r)	± 2s			r.i.
								(Ma)		(%)	(%)
067_VU114-KB13	fusion	included	0.0197261	0.594947	0.00455713	23.964	40.8092	5.80886	0.0601518	87.3499	4.54579	17.3201	0.590902		067_VU114-KB13	12	4	0.513163	0.00258581	0.000422413	2.62149e-05			0.0207734
068_VU114-KB13	fusion	included	0.0307304	0.46722	0.00200032	20.2324	34.7301	5.85526	0.0785529	79.0716	3.83792	18.6206	0.760504		068_VU114-KB13	12	4	0.460822	0.0023251	0.00069993	3.26057e-05			0.0269864
069_VU114-KB13	fusion	included	0.00732467	0.393599	0.00231207	18.2443	31.4002	5.8707	0.0787582	93.4453	3.4608	19.9316	1.07237		069_VU114-KB13	12	4	0.543195	0.00407406	0.00021808	3.43689e-05			0.0231474
070_VU114-KB13	fusion	included	0.0153513	0.848874	0.00473127	39.1476	66.9604	5.83448	0.0447766	93.5497	7.42598	19.8303	0.582165		070_VU114-KB13	12	4	0.547184	0.00276559	0.000214572	1.79128e-05			0.0150424
071_VU114-KB13	fusion	included	0.0258798	0.636067	0.00750006	28.24	48.5459	5.86372	0.0601419	86.232	5.3569	19.0911	0.693636		071_VU114-KB13	12	4	0.501844	0.00253536	0.000459901	2.5504e-05			0.0223872
073_VU114-KB13	fusion	included	0.0058622	0.493211	0	22.1	37.9613	5.85916	0.0613761	95.5469	4.19219	19.2676	0.71566		073_VU114-KB13	12	4	0.556513	0.00285716	0.00014762	2.91762e-05			0.00724638
074_VU114-KB13	fusion	included	0.0401001	0.604002	0.00650671	27.0394	45.974	5.79973	0.0673226	79.3072	5.12916	19.2499	0.752022		074_VU114-KB13	12	4	0.466629	0.00235236	0.000692022	2.73913e-05			0.0309527
075_VU114-KB13	fusion		0.171441	0.547787	0.00284894	25.5711	44.7678	5.97157	0.153211	46.6452	4.85064	20.0727	0.874609		075_VU114-KB13	12		0.266496	0.00131773	0.00178671	3.88453e-05			0.0504402
076_VU114-KB13	fusion	included	0.00867199	0.715347	0.00392775	29.2368	49.9493	5.82758	0.0517211	95.0265	5.546	17.5745	0.475947		076_VU114-KB13	12	4	0.556485	0.00293046	0.00016506	2.26128e-05			0.0113725
077_VU114-KB13	fusion	included	0.0493522	0.468488	0.00282588	16.7008	28.8364	5.88961	0.096694	66.1608	3.168	15.3287	0.577026		077_VU114-KB13	12	4	0.3833	0.00197617	0.00113268	3.40219e-05			0.0451401
079_VU114-KB13	fusion	included	0.00454902	0.533848	0.00206112	23.2374	39.7883	5.8406	0.0616225	96.6523	4.40794	18.7171	0.817904		079_VU114-KB13	12	4	0.564747	0.00290576	0.000110557	2.98025e-05			0.00555817
080_VU114-KB13	fusion	included	0.0111386	0.585552	0.00081848	26.0601	44.8266	5.86738	0.0607306	93.0503	4.9434	19.1373	0.961942		080_VU114-KB13	12	4	0.541204	0.00307489	0.000231322	2.67223e-05			0.0177362
081_VU114-KB13	fusion	included	0.0250356	0.524396	0.004726	22.4052	38.5329	5.86634	0.0708321	83.7184	4.25009	18.3721	0.660193		081_VU114-KB13	12	4	0.48699	0.00246798	0.000544164	3.04616e-05			0.0226928
082_VU114-KB13	fusion	included	0.00890678	0.775489	0.00282037	33.9944	58.3584	5.85574	0.0499046	95.5961	6.44847	18.8495	0.515043		082_VU114-KB13	12	4	0.557125	0.00276307	0.000145971	2.21294e-05			0.00782981
083_VU114-KB13	fusion	included	0.0103866	0.621773	0.00363952	28.6453	48.6785	5.79665	0.056201	93.9664	5.43379	19.8103	0.652027		083_VU114-KB13	12	4	0.553217	0.00296816	0.000200593	2.52676e-05			0.01282
089_VU114-KB13	fusion	included	0.0174983	0.417974	0.00207551	19.7383	33.8281	5.84596	0.0725923	86.5847	3.74419	20.3062	1.02228		089_VU114-KB13	12	4	0.505431	0.0027202	0.000448073	3.21635e-05			0.0228409
090_VU114-KB13	fusion	included	0.0508786	0.495356	0.00179099	22.4164	38.4472	5.85042	0.0808833	71.6539	4.25221	19.4588	0.62845		090_VU114-KB13	12	4	0.417923	0.00214827	0.000948564	3.02722e-05			0.0436928
091_VU114-KB13	fusion	included	0.0154742	0.990102	0.00936224	39.3251	67.0795	5.8185	0.0446408	93.5124	7.45966	17.0788	0.458764		091_VU114-KB13	12	4	0.548471	0.0027511	0.000215821	1.80094e-05			0.0145624
092_VU114-KB13	fusion	included	0.00934793	0.645545	0.00518112	28.1542	47.982	5.81335	0.0523283	94.4581	5.34063	18.7536	0.548063		092_VU114-KB13	12	4	0.554512	0.00293645	0.000184113	2.28969e-05			0.01173
093_VU114-KB13	fusion	included	0.0360351	0.714451	0.00862433	32.7175	55.6579	5.80283	0.0551953	83.7658	6.20624	19.6914	0.640883		093_VU114-KB13	12	4	0.49261	0.00245197	0.000542561	2.23781e-05			0.0284755
		S	0.56369	12.074	0.0783098	527.17	903.114			87.8236
Information on Analysis				Results		40(r)/39(k)	± 2s	Age	± 2s	MSWD	39Ar(k)	K/Ca	± 2s		Results			40(a)/36(a)	± 2s	40(r)/39(k)	± 2s	Age	± 2s	MSWD
								(Ma)			(%,n)											(Ma)
Sample = 075_VU114-KB13				Age Plateau		1.7107	0.00402139	5.83529	0.0270303	0.731279	95.1494	18.4723	0.584161		Inverse Isochron			301.041	7.07079	1.70904	0.00627103	5.82964	0.0315934	0.745539
Material = san							0.00235073		0.00463222	0.781798	19								0.0234878		0.00366933		0.00541944	0.757711
Location = Patmos				Full External Error					0.124701	1.66667	2σ Confidence Limit				Full External Error								0.125654
Analyst = Ina Boehm				Analytical Error					0.0136953	1	Error Magnification				Analytical Error								0.0213568
Project = PATMOS
Mass Discrimination Law = LIN				Total Fusion Age		1.71313	0.00447098	5.84359	0.0278651		20	18.7745	0.151269
Irradiation = VU114							0.00260982		0.00476849						Statistics			2σ Confidence Limit	1.68599		Convergence	2.20668e-05
J = 0.00186540 ± 0.00000373				Full External Error					0.125053									Error Magnification	1		Number of Iterations	3
Fcs 250-400 = 28.201 ± 0.006 Ma				Analytical Error					0.0152264									Number of Data Points	19		Calculated Line	Weighted York-2
																		Spreading Factor	0.3101
Incremental Heating			36Ar(a) [A]	37Ar(ca) [A]	38Ar(cl) [A]	39Ar(k) [A]	40Ar(r) [A]	Age	± 2s	40Ar(r)	39Ar(k)	K/Ca	± 2s		Inverse Isochron			39(k)/40(a+r)	± 2s	36(a)/40(a+r)	± 2s			r.i.
								(Ma)		(%)	(%)
033_VU114-KB14A_COMBINED	fusion		0.787246	0.243716	0.0237788	21.9105	29.8332	4.6149	0.520781	11.2624	8.6386	38.6578	1.28455		033_VU114-KB14A_COMBINED	12		0.0827206	0.000298366	0.00297216	4.20753e-05			0.0571721
052_VU114-KB14A_COMBINED	fusion		0.369009	0.0899968	0.0124482	11.3919	16.1354	4.8004	0.494169	12.7738	4.49144	54.4297	4.94938		052_VU114-KB14A_COMBINED	12		0.090192	0.000403244	0.00292153	4.35686e-05			0.0387037
053_VU114-KB14A_COMBINED	fusion		0.377577	0.100145	0.0193973	14.5507	19.5343	4.55024	0.390788	14.7678	5.73688	62.4772	4.69312		053_VU114-KB14A_COMBINED	12		0.110013	0.000521568	0.00285473	4.19486e-05			0.0456765
076_VU114-KB14A_COMBINED	fusion		0.459917	0.110438	0.0229834	16.5472	23.2351	4.759	0.424976	14.4711	6.52403	64.4281	5.05671		076_VU114-KB14A_COMBINED	12		0.103067	0.000417909	0.00286467	4.28107e-05			0.0386913
096_VU114-KB14A_COMBINED	fusion	included	0.379	0.0977018	0.0152829	13.0958	16.0449	4.15313	0.459258	12.4177	5.16325	57.6365	4.51993		096_VU114-KB14A_COMBINED	12	4	0.101361	0.000424537	0.00293345	4.55327e-05			0.0442627
120_VU114-KB14A_COMBINED	fusion	included	0.377963	0.125326	0.0161427	14.0268	18.1342	4.38209	0.392475	13.8438	5.5303	48.1265	2.80494		120_VU114-KB14A_COMBINED	12	4	0.107092	0.000628465	0.00288568	4.09414e-05			0.0426529
121_VU114-KB14A_COMBINED	fusion	included	0.411512	0.0981547	0.0135623	13.2406	16.8869	4.32305	0.480208	12.0828	5.22035	58.005	5.44451		121_VU114-KB14A_COMBINED	12	4	0.0947463	0.000464997	0.00294467	4.44374e-05			0.0560865
144_VU114-KB14A_COMBINED	fusion	included	0.284322	0.068193	0.0106798	10.9637	13.6554	4.2219	0.4089	13.856	4.32262	69.1328	7.94731		144_VU114-KB14A_COMBINED	12	4	0.111258	0.000586769	0.00288527	4.44062e-05			0.052928
145_VU114-KB14A_COMBINED	fusion	included	0.303779	0.0931446	0.0125068	12.1784	15.7548	4.38494	0.371781	14.7986	4.80155	56.2214	5.15487		145_VU114-KB14A_COMBINED	12	4	0.114404	0.000484595	0.0028537	4.14636e-05			0.0680279
164_VU114-KB14A_COMBINED	fusion		0.442447	0.0933166	0.0118288	10.6486	14.5117	4.6189	0.607029	9.89764	4.19841	49.0685	4.0834		164_VU114-KB14A_COMBINED	12		0.0726329	0.000291631	0.00301788	4.3091e-05			0.0455151
165_VU114-KB14A_COMBINED	fusion	included	0.376708	0.0969747	0.0132611	11.8056	14.7711	4.24115	0.490735	11.6078	4.65456	52.3476	5.63321		165_VU114-KB14A_COMBINED	12	4	0.0927812	0.000359508	0.00296059	4.45143e-05			0.052925
188_VU114-KB14A_COMBINED	fusion	included	0.429021	0.0852645	0.013407	14.9445	18.6723	4.23522	0.430117	12.7218	5.89212	75.3668	6.77007		188_VU114-KB14A_COMBINED	12	4	0.101829	0.000448819	0.00292327	4.27109e-05			0.0785242
189_VU114-KB14A_COMBINED	fusion		0.358874	0.102334	0.0148403	11.6836	13.897	4.03205	0.497384	11.4801	4.60647	49.0938	4.94301		189_VU114-KB14A_COMBINED	12		0.0965248	0.000438156	0.00296486	4.69658e-05			0.0509579
212_VU114-KB14A_COMBINED	fusion	included	0.273727	0.0611611	0.006927	9.05554	10.8861	4.07507	0.512951	11.7538	3.57031	63.666	12.6979		212_VU114-KB14A_COMBINED	12	4	0.0977816	0.000555573	0.00295569	4.90484e-05			0.0593915
213_VU114-KB14A_COMBINED	fusion	included	0.272343	0.0705024	0.0079568	8.72193	10.8843	4.23006	0.5231	11.8047	3.43877	53.1957	6.06283		213_VU114-KB14A_COMBINED	12	4	0.094603	0.0004416	0.00295399	4.84413e-05			0.0497823
230_VU114-KB14A_COMBINED	fusion	included	0.429229	0.113015	0.0134313	12.9741	15.6783	4.09636	0.497494	10.8998	5.11527	49.3641	2.79082		230_VU114-KB14A_COMBINED	12	4	0.090205	0.000337612	0.0029843	4.38674e-05			0.048706
236_VU114-KB14A_COMBINED	fusion	included	0.357232	0.0946422	0.0112407	12.7823	15.4956	4.10935	0.424687	12.6845	5.03966	58.0756	6.35286		236_VU114-KB14A_COMBINED	12	4	0.104644	0.000378732	0.00292452	4.34348e-05			0.0493723
250_VU114-KB14A_COMBINED	fusion		0.315525	0.0871748	0.0115483	9.76409	11.3423	3.9379	0.482996	10.7455	3.84966	48.1625	5.81872		250_VU114-KB14A_COMBINED	12		0.0925106	0.000474339	0.00298947	4.36511e-05			0.0356285
252_VU114-KB14A_COMBINED	fusion	included	0.29598	0.0663683	0.010109	11.2965	13.9448	4.1844	0.40462	13.6283	4.45385	73.1901	9.36312		252_VU114-KB14A_COMBINED	12	4	0.110412	0.000458939	0.0028929	4.36125e-05			0.0679053
269_VU114-KB14A_COMBINED	fusion		0.362854	0.10594	0.0109877	12.0525	14.2982	4.02151	0.472734	11.6584	4.7519	48.92	2.86459		269_VU114-KB14A_COMBINED	12		0.0982817	0.000395823	0.00295889	4.54408e-05			0.047654
		S	7.66427	2.00351	0.27232	253.635	323.596			12.675
Information on Analysis				Results		40(r)/39(k)	± 2s	Age	± 2s	MSWD	39Ar(k)	K/Ca	± 2s		Results			40(a)/36(a)	± 2s	40(r)/39(k)	± 2s	Age	± 2s	MSWD
								(Ma)			(%,n)											(Ma)
Sample = 250_VU114-KB14A				Age Plateau Overestimated Error		1.24837	0.0376648	4.23158	0.13054	0.235307	57.2026	54.1295	4.39968		Inverse Isochron Overestimated Error			293.668	14.7443	1.38744	0.40703	4.70237	1.3781	0.221258
Material = Biotite							0.0301712		0.030849	0.995125	12								0.0502073		0.293369		0.293066	0.994436
Location = Patmos				Full External Error					0.157604	1.8528	2σ Confidence Limit				Full External Error								1.38159
Analyst = Ina Boehm				Analytical Error					0.127524	1	Error Magnification				Analytical Error								1.37776
Project = VU114
Mass Discrimination Law = LIN				Total Fusion Age		1.27583	0.0314805	4.32457	0.110327		20	54.436	1.05663
Irradiation = VU114							0.0246744		0.0255117						Statistics			2σ Confidence Limit	1.89443		Convergence	0.000117464
J = 0.00185290 ± 0.00000611				Full External Error					0.142537									Error Magnification	1		Number of Iterations	3
Dra = 28.201 ± 0.006 Ma				Analytical Error					0.10658									Number of Data Points	12		Calculated Line	Weighted York-2
																		Spreading Factor	0.0335743
Incremental Heating			36Ar(a) [A]	37Ar(ca) [A]	38Ar(cl) [A]	39Ar(k) [A]	40Ar(r) [A]	Age	± 2s	40Ar(r)	39Ar(k)	K/Ca	± 2s		Inverse Isochron			39(k)/40(a+r)	± 2s	36(a)/40(a+r)	± 2s			r.i.
								(Ma)		(%)	(%)
069_VU114-KB15A_COMBINED	fusion	included	0.0790379	0.858023	0.0355433	22.8115	39.6688	5.86908	0.0768023	62.6819	8.24336	11.432	0.199415		069_VU114-KB15A_COMBINED	12	4	0.360562	0.00128167	0.00124929	2.60645e-05			0.0407245
070_VU114-KB15A_COMBINED	fusion	included	0.0760646	0.814747	0.034524	20.7813	36.6999	5.96013	0.0951744	61.7557	7.50972	10.9678	0.213108		070_VU114-KB15A_COMBINED	12	4	0.349796	0.00135852	0.00128034	3.15723e-05			0.0526666
093_VU114-KB15A_COMBINED	fusion	included	0.0827563	0.799012	0.0327829	19.7064	34.3283	5.87919	0.081721	58.1314	7.1213	10.6053	0.184367		093_VU114-KB15A_COMBINED	12	4	0.333804	0.00122051	0.00140179	2.56879e-05			0.0441945
094_VU114-KB15A_COMBINED	fusion		0.053608	0.425216	0.0187409	11.2295	19.0587	5.72829	0.121498	54.3392	4.05799	11.3558	0.273424		094_VU114-KB15A_COMBINED	12		0.320257	0.00188359	0.00152886	3.64832e-05			0.051097
117_VU114-KB15A_COMBINED	fusion	included	0.104378	0.883273	0.0409757	24.1341	41.3134	5.77757	0.0853369	56.9862	8.72132	11.7491	0.2271		117_VU114-KB15A_COMBINED	12	4	0.332992	0.00128019	0.00144016	2.67776e-05			0.0454889
118_VU114-KB15A_COMBINED	fusion	included	0.0823026	0.77727	0.0320642	17.4462	30.2358	5.84921	0.100728	55.1516	6.30452	9.65156	0.170431		118_VU114-KB15A_COMBINED	12	4	0.318314	0.00123671	0.00150165	3.05442e-05			0.0490429
141_VU114-KB15A_COMBINED	fusion	included	0.109997	0.533949	0.0321643	18.0773	31.3309	5.84944	0.123645	48.8118	6.53259	14.5581	0.304529		141_VU114-KB15A_COMBINED	12	4	0.281703	0.00107323	0.00171411	3.35575e-05			0.0503725
142_VU114-KB15A_COMBINED	fusion	included	0.0607624	0.458029	0.0277582	15.1477	26.5431	5.91389	0.109723	59.3841	5.47392	14.2208	0.271847		142_VU114-KB15A_COMBINED	12	4	0.338994	0.00153943	0.00135981	3.52134e-05			0.0587974
161_VU114-KB15A_COMBINED	fusion	included	0.0459581	0.310523	0.0259202	15.1911	26.5108	5.88986	0.0828958	65.8733	5.4896	21.0361	0.643136		161_VU114-KB15A_COMBINED	12	4	0.377588	0.0014451	0.00114233	2.94933e-05			0.0425119
162_VU114-KB15A_COMBINED	fusion	included	0.0635047	0.223122	0.0283174	15.9433	27.7954	5.88393	0.105549	59.4312	5.76141	30.7258	1.48724		162_VU114-KB15A_COMBINED	12	4	0.340994	0.00141783	0.00135823	3.42054e-05			0.0589871
185_VU114-KB15A_COMBINED	fusion	included	0.0669196	0.619695	0.0396592	22.469	38.766	5.82299	0.0711196	65.968	8.11962	15.591	0.322081		185_VU114-KB15A_COMBINED	12	4	0.382481	0.00173363	0.00113914	2.40567e-05			0.0961832
186_VU114-KB15A_COMBINED	fusion		0.113777	1.16667	0.0321856	20.3753	36.171	5.99124	0.101505	51.5566	7.36299	7.50973	0.141211		186_VU114-KB15A_COMBINED	12		0.290493	0.00118373	0.00162214	2.78248e-05			0.061375
209_VU114-KB15A_COMBINED	fusion	included	0.0513025	0.286154	0.0250933	15.4916	27.1569	5.9163	0.0966263	63.9179	5.5982	23.2791	0.847371		209_VU114-KB15A_COMBINED	12	4	0.364735	0.0013762	0.00120787	3.37386e-05			0.031897
210_VU114-KB15A_COMBINED	fusion	included	0.0652915	0.377806	0.0250237	15.1938	26.2466	5.83024	0.105833	57.3658	5.49056	17.2928	0.423269		210_VU114-KB15A_COMBINED	12	4	0.332177	0.00136	0.00142745	3.34472e-05			0.060077
229_VU114-KB15A_COMBINED	fusion	included	0.072959	1.0191	0.0382631	22.7272	39.9215	5.92828	0.0816652	64.6778	8.2129	9.58949	0.176056		229_VU114-KB15A_COMBINED	12	4	0.368325	0.00157142	0.0011824	2.77239e-05			0.0660737
		S	1.12862	9.55259	0.469016	276.725	481.747			60.0105
Information on Analysis				Results		40(r)/39(k)	± 2s	Age	± 2s	MSWD	39Ar(k)	K/Ca	± 2s		Results			40(a)/36(a)	± 2s	40(r)/39(k)	± 2s	Age	± 2s	MSWD
								(Ma)			(%,n)											(Ma)
Sample = 094_VU114-KB15A				Age Plateau		1.73995	0.00825249	5.87234	0.0476507	1.23206	88.579	11.643	1.49919		Inverse Isochron			294.127	11.4762	1.75672	0.0439476	5.92884	0.153148	1.28715
Material = biotite							0.00474294		0.00811443	0.25342	13								0.0390177		0.0250168		0.025831	0.224336
Location = Patmos				Full External Error					0.131448	1.8165	2σ Confidence Limit				Full External Error								0.196855
Analyst = Ina Boehm				Analytical Error					0.0278075	1.10998	Error Magnification				Analytical Error								0.148081
Project = VU114
Mass Discrimination Law = LIN				Total Fusion Age		1.74089	0.00727736	5.87548	0.0458284		15	12.4565	0.0694665
Irradiation = VU114							0.00418026		0.00779994						Statistics			2σ Confidence Limit	1.8528		Convergence	0.000169537
J = 0.00184570 ± 0.00000609				Full External Error					0.13086									Error Magnification	1.13453		Number of Iterations	3
Dra = 28.201 ± 0.006 Ma				Analytical Error					0.0245217									Number of Data Points	13		Calculated Line	Weighted York-2
																		Spreading Factor	0.177038
Fluence monitor: Fish Canyon Tuff Sanidine (Kuiper et al. 2008)
	J value	n
s1	0.0018585	10
s2	0.0018576	10
s3	0.0018557	10
s4	0.0018666	10
s5	0.0018675	10
s6	0.0018657	10
s7	0.0018716	11
s8	0.0018732	11
s9	0.001873	11
s10	0.0018807	7
s11	0.0018865	8
s12	0.0018835	9
s16	0.0019304	14
s17	0.0019264	10
s18	0.0019315	10
s19	0.0019294	14
s20	0.0019361	10
s21	0.0019302	14
Decay constant plus uncertainties (Min et al. 2000, Audi et al. 1997, Endt and Van der Leun 1973)
			%SD
40K	5.46e-10	±	0.979
40KEC,ß+	5.8e-11	±	1.207
40Kß-	4.88e-10	±	1.014
39Ar	2.94e-07	±	0.558
37Ar	0.000823	±	0.143
36Cl	2.257e-05	±	0.65
Interfering isotope production ratios
			%SD
(40Ar/36Ar)trapped	298.56	±	0.104
(40Ar/36Ar)cosmogenic	0.018	±	35
(38Ar/36Ar)trapped	0.1885	±	0.159
(38Ar/36Ar)cosmogenic	1.493	±	3
(39Ar/37Ar)Ca	0.000673	±	0.55
(36Ar/37Ar)Ca	0.00264	±	0.64
(40Ar/39Ar)K	0.00086	±	8.1
(38Ar/39Ar)K	0.01211	±	0.25
K/Ca	0.43

## Sheet: TableS2
Table A3. Age data from literature
Fytikas et al., 1976
Sample ID	K-ArAge (Ma)	Material	Rock
PAT-12	4.38 ± 0.15	total rock	alkali basalt lava flow of Chilomodi
PAT-34	7.03 ± 0.25	biotite + groundmass	trachyte lava dome of Lefki bay
PAT28	7.20 ± 0.25	biotite	trachyte intrusive facies of Prasso Mt
Wyers (1987)
Sample ID	K-Ar Age (Ma)	Material	Rock
Pat-180	5.53 ± 0.08	whole rock	Main Volcanic Series Hy-trachybasalt
Pat-105	5.67 ± 0.12	whole rock	Main volcainc Series Hy-trachyandesite
Pat-220	4.49 ± 0.06	whole rock	Young Volcanic Series Ne-trachybasalt; Chilomodi
Pat-201	6.14 ± 0.17	whole rock	Phonolite
Pat-148	5.59 ± 0.08	whole rock	Rhyolite
Sample ID	Ar-Ar Age (Ma)	Material	Rock
Pat-187	5.49 ± 0.16 / 5.46 ± 0.29	whole rock	Main Volcanic Series Hy-trachybasalt
Pat-179	4.66 ± 0.22 / 4.62 ± 0.31	whole rock	Young Volcanic Series Ne-trachybasalt; Chilomodi
Pat-136	6.27 ± 0.10 / 6.17 ± 0.10	whole rock	Trachyte

## Sheet: TableS3
Table S3. Compilation of literature data of phonolites and lamproites (and similar rocks) near or on patmos island.
Sample	Paper	Name	Unit	Age (Ma)	SiO2	Al2O3	Fe2O3	MgO	CaO	Na2O	K2O	TiO2	P2O5	MnO	LOI	Cs	Rb	Ba	Sr	Pb	Th	U	Zr	Hf	Ta	Y	Nb	Sc	Cr	Ni	Co	V	W	Ga	Zn	Cu	La	Ce	Pr	Nd	Sm	Eu	Gd	Tb	Dy	Ho	Er	Tm	Yb
SF-11	Altunkaynak et al. 2010	Phonolite	Foça mafic rocks	14.2	58.0365	19.8014	4.81362	0.22678	1.44327	7.83157	5.88317	0.09092	0.04433	0.18268	1.13	20.1363	353	5.34533	17.02	68.99	76.57	7.679	906.8	18.2767	6.123	57.48	98.74	1.242	2.756	n.a.	1.116	3.067	n.a.	n.a.	n.a.	n.a.	146.7	268.9	26.09	83.715	13.595	0.29605	10.16	1.588	9.06175	1.833	5.251	n.a.	5.79833
1026a	Akay and Erdogan 2004	Phonolite	Foca alkaline volcanics	14.12	58.3	19.46	4.7	0.16	1.48	8.93	7.2	0.099	0.037	0.179	1.14	n.a.	370.7	22	53.1	63.3	68.6	n.a.	854	n.a.	n.a.	52.7	83.8	0.4	nd	5.2	n.a.	2.6	n.a.	n.a.	120.6	7	131.2	238.9	n.a.	70.6	n.a.	n.a.	n.a.	n.a.	n.a.	n.a.	n.a.	n.a.	n.a.
1026b	Akay and Erdogan 2004	Phonolite	Foca alkaline volcanics	n.a.	57.3	19.07	4.58	0.1	1.38	7.63	5.98	0.102	0.036	0.136	1.51	n.a.	354.9	35.8	91.5	77.8	55.5	n.a.	782.5	n.a.	n.a.	50.1	83.9	nd	nd	5.9	n.a.	6.5	n.a.	n.a.	118	7.4	132.4	257.4	n.a.	74.4	n.a.	n.a.	n.a.	n.a.	n.a.	n.a.	n.a.	n.a.	n.a.
1063e	Akay and Erdogan 2004	Tephriphonolite	Foca alkaline volcanics	14.12	61.14	18.15	4.45	0.71	1.09	4.48	9.34	0.67	0.245	0.083	1.59	n.a.	299.1	1202	131.8	56.4	32.2	n.a.	346.9	n.a.	n.a.	31.1	34.4	4.6	nd	6.1	n.a.	28.3	n.a.	n.a.	79.8	6.5	95.9	168.2	n.a.	57.5	n.a.	n.a.	n.a.	n.a.	n.a.	n.a.	n.a.	n.a.	n.a.
23a	Akal et al. 2013	Tephriphonolite	Afyon Region Okkaya Tepe	n.a.	57.8	16.18	n.a.	1.55	3.56	1.97	9.56	0.98	0.34	0.07	1.25	n.a.	n.a.	n.a.	n.a.	n.a.	n.a.	n.a.	n.a.	n.a.	n.a.	n.a.	n.a.	n.a.	n.a.	n.a.	n.a.	n.a.	n.a.	n.a.	n.a.	n.a.	n.a.	n.a.	n.a.	n.a.	n.a.	n.a.	n.a.	n.a.	n.a.	n.a.	n.a.	n.a.	n.a.
23b	Akal et al. 2013	Tephriphonolite	Afyon Region Okkaya Tepe	n.a.	56.19	15.47	n.a.	1.78	4.38	1.62	9.61	0.99	0.33	0.09	1.54	n.a.	n.a.	n.a.	n.a.	n.a.	n.a.	n.a.	n.a.	n.a.	n.a.	n.a.	n.a.	n.a.	n.a.	n.a.	n.a.	n.a.	n.a.	n.a.	n.a.	n.a.	n.a.	n.a.	n.a.	n.a.	n.a.	n.a.	n.a.	n.a.	n.a.	n.a.	n.a.	n.a.	n.a.
23c	Akal et al. 2013	Tephriphonolite	Afyon Region Okkaya Tepe	n.a.	56.35	15.61	n.a.	1.7	5.17	1.68	9.48	0.98	0.33	0.09	2.26	n.a.	n.a.	n.a.	n.a.	n.a.	n.a.	n.a.	n.a.	n.a.	n.a.	n.a.	n.a.	n.a.	n.a.	n.a.	n.a.	n.a.	n.a.	n.a.	n.a.	n.a.	n.a.	n.a.	n.a.	n.a.	n.a.	n.a.	n.a.	n.a.	n.a.	n.a.	n.a.	n.a.	n.a.
10	Akal et al. 2013	Phonotephrite	Afyon region Killimatan Tepe (S of Devkaya Tepe)	n.a.	51.13	16.74	n.a.	4.33	8.25	3.86	4.52	1	0.62	0.12	1.28	n.a.	n.a.	n.a.	n.a.	n.a.	n.a.	n.a.	n.a.	n.a.	n.a.	n.a.	n.a.	n.a.	n.a.	n.a.	n.a.	n.a.	n.a.	n.a.	n.a.	n.a.	n.a.	n.a.	n.a.	n.a.	n.a.	n.a.	n.a.	n.a.	n.a.	n.a.	n.a.	n.a.	n.a.
11	Akal et al. 2013	Phonotephrite	Afyon regionKara Tepe	n.a.	52.49	18.04	n.a.	3.26	6.98	3.42	5.32	1.03	0.72	0.12	1.02	n.a.	n.a.	n.a.	n.a.	n.a.	n.a.	n.a.	n.a.	n.a.	n.a.	n.a.	n.a.	n.a.	n.a.	n.a.	n.a.	n.a.	n.a.	n.a.	n.a.	n.a.	n.a.	n.a.	n.a.	n.a.	n.a.	n.a.	n.a.	n.a.	n.a.	n.a.	n.a.	n.a.	n.a.
13	Akal et al. 2013	Phonotephrite	Afyon region betw. Kara Tepe and Göktepe	n.a.	51.26	17.58	n.a.	3.6	7.79	4.48	4.99	1.01	0.71	0.13	0.96	n.a.	n.a.	n.a.	n.a.	n.a.	n.a.	n.a.	n.a.	n.a.	n.a.	n.a.	n.a.	n.a.	n.a.	n.a.	n.a.	n.a.	n.a.	n.a.	n.a.	n.a.	n.a.	n.a.	n.a.	n.a.	n.a.	n.a.	n.a.	n.a.	n.a.	n.a.	n.a.	n.a.	n.a.
14a	Akal et al. 2013	Phonotephrite	Afyon region Göktepe	n.a.	51.39	17.55	n.a.	3.6	7.57	4.38	5.1	1.03	0.72	0.13	0.7	n.a.	n.a.	n.a.	n.a.	n.a.	n.a.	n.a.	n.a.	n.a.	n.a.	n.a.	n.a.	n.a.	n.a.	n.a.	n.a.	n.a.	n.a.	n.a.	n.a.	n.a.	n.a.	n.a.	n.a.	n.a.	n.a.	n.a.	n.a.	n.a.	n.a.	n.a.	n.a.	n.a.	n.a.
14b	Akal et al. 2013	Phonotephrite	Afyon region Göktepe	n.a.	51.84	17.86	n.a.	3.52	7.66	4.38	5.07	1	0.71	0.12	0.83	n.a.	n.a.	n.a.	n.a.	n.a.	n.a.	n.a.	n.a.	n.a.	n.a.	n.a.	n.a.	n.a.	n.a.	n.a.	n.a.	n.a.	n.a.	n.a.	n.a.	n.a.	n.a.	n.a.	n.a.	n.a.	n.a.	n.a.	n.a.	n.a.	n.a.	n.a.	n.a.	n.a.	n.a.
21	Akal et al. 2013	Phonotephrite	Afyon regionToklu Tepe (W of Devkaya Tepe)	n.a.	52.2	17.83	n.a.	3.42	7.22	4.29	5.04	1.01	0.71	0.12	0.7	n.a.	n.a.	n.a.	n.a.	n.a.	n.a.	n.a.	n.a.	n.a.	n.a.	n.a.	n.a.	n.a.	n.a.	n.a.	n.a.	n.a.	n.a.	n.a.	n.a.	n.a.	n.a.	n.a.	n.a.	n.a.	n.a.	n.a.	n.a.	n.a.	n.a.	n.a.	n.a.	n.a.	n.a.
24a	Akal et al. 2013	Phonotephrite	Afyon region Bahcegöney Tepe	n.a.	51.98	17.31	n.a.	3.8	7.81	4.2	4.99	0.98	0.66	0.12	0.75	n.a.	n.a.	n.a.	n.a.	n.a.	n.a.	n.a.	n.a.	n.a.	n.a.	n.a.	n.a.	n.a.	n.a.	n.a.	n.a.	n.a.	n.a.	n.a.	n.a.	n.a.	n.a.	n.a.	n.a.	n.a.	n.a.	n.a.	n.a.	n.a.	n.a.	n.a.	n.a.	n.a.	n.a.
33	Akal et al. 2013	Phonotephrite	Afyon region	n.a.	51.78	16.91	n.a.	4.43	8.2	3.87	5.06	1	0.63	0.12	0.92	n.a.	n.a.	n.a.	n.a.	n.a.	n.a.	n.a.	n.a.	n.a.	n.a.	n.a.	n.a.	n.a.	n.a.	n.a.	n.a.	n.a.	n.a.	n.a.	n.a.	n.a.	n.a.	n.a.	n.a.	n.a.	n.a.	n.a.	n.a.	n.a.	n.a.	n.a.	n.a.	n.a.	n.a.
28a	Akal et al. 2013	Phonolite	Afyon regionDevkaya Tepe	n.a.	59.25	21.21	n.a.	0.11	0.94	9.27	5.76	0.11	0.01	0.14	1.12	n.a.	n.a.	n.a.	n.a.	n.a.	n.a.	n.a.	n.a.	n.a.	n.a.	n.a.	n.a.	n.a.	n.a.	n.a.	n.a.	n.a.	n.a.	n.a.	n.a.	n.a.	n.a.	n.a.	n.a.	n.a.	n.a.	n.a.	n.a.	n.a.	n.a.	n.a.	n.a.	n.a.	n.a.
28b	Akal et al. 2013	Phonolite	Afyon regionDevkaya Tepe	n.a.	58.9	21.07	n.a.	0.18	1.15	9.68	5.69	0.11	0.01	0.14	1.2	n.a.	n.a.	n.a.	n.a.	n.a.	n.a.	n.a.	n.a.	n.a.	n.a.	n.a.	n.a.	n.a.	n.a.	n.a.	n.a.	n.a.	n.a.	n.a.	n.a.	n.a.	n.a.	n.a.	n.a.	n.a.	n.a.	n.a.	n.a.	n.a.	n.a.	n.a.	n.a.	n.a.	n.a.
1	Francelanci et al. 2000	Phonolitic leucite	Afyon K-rocks phonolitic leucites	n.a.	45.46	17.53	8.15	2.56	6.86	1.05	12.59	1.05	±	0.16	3.61	28.7	465	6326	2362	90	53	19	553	13.2	2.16	27	40	4.1	12	8	14	170	n.a.	n.a.	-118	137	98	190	22.1	79	12.9	3.5	19.7	1.1	5.1	0.93	2.21	0.31	2.1
10	Francelanci et al. 2000	Phonolitic leucite	Afyon K-rocks phonolitic leucites	n.a.	48.33	16.33	6.64	1.57	6.4	2.33	8.72	1.42	0.3	0.21	2.83	23.1	726	8332	3307	107	54	16.5	777	18.9	2.78	32	52	5.7	9	13	14	242	n.a.	n.a.	79	100	109	204	n.a.	79	13.4	4	n.a.	1.4	7.3	1.1	2.88	0.41	2.7
11S	Francelanci et al. 2000	Phonolitic leucite	Afyon K-rocks phonolitic leucites	n.a.	51.17	18.45	4.02	1.71	5.14	2.15	10.53	1.17	0.17	0.12	2.21	n.a.	520	4506	2071	80	41	n.a.	759	n.a.	n.a.	25	41	n.a.	27	19	16	192	n.a.	n.a.	76	85	93	180	21.9	73	n.a.	n.a.	10.8	n.a.	n.a.	n.a.	n.a.	n.a.	n.a.
26/3	Francelanci et al. 2000	Phonolitic leucite	Afyon K-rocks phonolitic leucites	n.a.	49.13	16.42	4.3	4.05	7.8	1.16	9.51	1.32	0.88	0.12	1.98	25.2	523	5147	1882	69	38	7.6	602	16.9	2.13	31	33	16	42	25	25	244	n.a.	n.a.	79	72	96	190	10.9	84	14.4	4	11.1	1.2	6.3	1.12	2.69	0.34	2.3
24	Francelanci et al. 2000	Phonolitic leucite	Afyon K-rocks phonolitic leucites	n.a.	50.21	10.42	3.93	6.16	9.44	1.38	7.94	1.42	1.71	0.16	3.7	2.6	199	3242	1213	46	19	5.9	379	10.1	1.23	23	26	18	159	66	28	159	n.a.	n.a.	n.a.	55	43	89	13.4	45	8.6	2.43	7.3	0.96	5.1	0.79	2.05	0.28	1.8
21	Francelanci et al. 2000	Phonolitic leucite	Afyon K-rocks phonolitic leucites	n.a.	51.29	11.75	1.51	9.39	5.97	1.77	6.15	1.64	1.21	0.11	3.97	49	198	1652	742	19.4	13	5.1	648	18.6	1.86	27	30	16	518	298	33	163	n.a.	n.a.	60	42	50	109	n.a.	53	9.4	2.27	n.a.	1	5.4	0.98	2.38	0.35	2.1
26/2	Francelanci et al. 2000	Phonolitic leucite	Afyon K-rocks phonolitic leucites	n.a.	52.59	17.82	4.02	4.38	5.16	0.86	8.9	1.07	0.71	0.07	2.33	n.a.	1128	4210	1700	77	32	n.a.	528	n.a.	n.a.	45	25	n.a.	153	74	14	151	n.a.	n.a.	n.a.	n.a.	86	145	n.a.	60	n.a.	n.a.	n.a.	n.a.	n.a.	n.a.	n.a.	n.a.	n.a.
28A	Prelevic et al. 2015	Phonolite	Afyon alkaline complex	11.4	59.25	21.21	n.a.	0.11	0.94	9.27	5.76	0.11	0.01	0.14	1.12	26.7067	374.02	56.26	30.5333	72.2167	137.023	47.4167	982.75	16.95	1.14433	7.39667	56.6633	2.34	0.466333	0.389667	32.5133	11.1833	n.a.	31.84	72.42	2.98	145.833	175.727	12.52	27.6	2.07667	0.246	1.102	0.123	0.765667	0.153667	0.603	0.124667	1.14367
28B	Prelevic et al. 2015	Phonolite	Afyon alkaline complex	11.4	58.9	21.07	n.a.	0.18	1.15	9.68	5.69	0.11	0.01	0.14	1.2	23.4333	339.083	28.22	58.3333	71.1	136.043	27.5067	1017.98	17.93	1.16333	7.90333	56.6267	2.19333	50.6933	1.248	0.651333	14.7767	n.a.	29.28	89.9567	3.53	136.72	167.753	11.7267	26.28	1.99667	0.248	1.17467	0.132333	0.766333	0.158333	0.614333	0.139667	1.23367
53A	Prelevic et al. 2015	Nosean phonolite	Afyon alkaline complex	11.4	56.27	19.68	n.a.	1.63	5.13	2.84	6.31	0.74	0.31	0.08	2.1	22.21	132.107	2328.11	2506.63	30.0333	44.55	6.86333	393.32	8.15667	2.54667	23.63	42.2367	4.82333	54.5233	28.7933	8.89	99.52	n.a.	55.71	58.6667	6.78	153.23	241.163	25.0533	86.2967	11.57	2.81	7.31333	0.846333	4.35667	0.808	2.24667	0.333333	2.25667
60	Prelevic et al. 2015	Phonotephrite	Afyon alkaline complex	11.4	48.39	20.82	n.a.	7.1	10.53	1.47	3.72	0.72	0.47	0.136	0.39	8.63333	231.817	2833.58	3647.13	37.03	78.62	25.1767	575.227	13.4	3.31667	35.5567	58.9533	23.5667	167.497	40.4467	67.4133	177.107	n.a.	71.9467	82.1267	49.72	244.463	397.287	40.81	147.193	21.6167	5.25667	12.86	1.38333	7.10667	1.22333	3.33	0.479667	3.38
29	Prelevic et al. 2015	Phonotephrite	Afyon alkaline complex	11.4	48.71	14.57	n.a.	6.29	10.86	2.87	3.97	1	0.68	0.11	1.28	3.44333	202.52	2388.62	2848.76	10.3433	35.26	7.75667	309.393	7.53667	1.79333	25.8067	29.4067	19.2333	202.693	48.3267	39.1	154.633	n.a.	53.13	32.7267	32.0267	173.96	304.783	33.5333	125.377	17.7367	4.33	11.16	1.10333	5.50667	0.921333	2.26	0.304	1.81333
US-17	Elitok 2019	Phonolitic leucitite	Senirkent - Isparta	n.a.	51.77	18.94	5.36	0.9	3.77	0.86	10.16	0.76	0.16	0.1	6.2	38.1	947.8	5077	2146	48.5	72.3	6.7	575.3	13.9	2.7	30.4	38.6	2	n.a.	0.5	6.1	108	2.5	20.2	25	10.3	108	200.2	21.84	82.1	12.51	2.98	9.87	1.14	5.39	0.97	2.94	0.44	2.86
US-18	Elitok 2019	Phonolitic leucitite	Senirkent - Isparta	n.a.	50.78	18.46	5.01	1.39	5.15	3.31	10.67	0.74	0.15	0.11	3.2	19.3	369.7	5082	2354	102.8	71.1	28.6	559.7	14.7	2.6	28.1	37.7	2	n.a.	1.2	6.1	122	4.1	21.1	47	19	101.3	195.7	20.95	79.1	11.93	2.83	9.32	1.11	5.5	0.92	2.75	0.41	2.69
US-24	Elitok 2019	Phonolitic leucitite	Senirkent - Isparta	n.a.	49.35	18.58	5.57	0.79	5.7	2.51	11.32	0.82	0.13	0.11	3.9	19.7	469.1	5321	3509	108.5	63.7	19.8	562.5	15.5	2.3	23.1	36.6	2	n.a.	0.5	7.9	149	1.7	19.2	42	19.4	81.9	150.8	15.4	56.4	9.12	2.23	7.43	0.89	4.2	0.83	2.37	0.38	2.23
US-25	Elitok 2019	Phonolitic leucitite	Senirkent - Isparta	n.a.	49.55	18.73	5.54	1.06	5.41	1.99	11.38	0.83	0.13	0.11	4.2	17.8	400.2	5234	2245	108	63.9	28.5	566.3	14.5	2.2	22.7	36.5	2	n.a.	0.2	8.5	157	1.2	17.9	40	20.2	80.4	151.5	15.53	59.9	8.85	2.17	7.05	0.89	4.45	0.79	2.21	0.36	2.28
SC-1	Elitok 2019	Sanidine-phyric phonolite	Senirkent - Isparta	n.a.	55.79	17.71	4.15	1.13	4.38	1.53	10.54	0.52	0.18	0.08	3.3	12.3	392.2	2457	1792	99.2	76.5	11	807.3	22.2	1.5	18	37.9	4	n.a.	5.9	6.5	96	0.5	19.7	57	35.3	116.8	203.5	18.92	61.1	8.31	2.01	4.77	0.7	3.12	0.56	1.59	0.23	1.63
90	Akal et al. 2013	Lamproites	Afyon region	n.a.	50.65	10.03	n.a.	6.35	8.36	1.31	7.81	1.36	1.56	0.13	4.7	n.a.	n.a.	n.a.	n.a.	n.a.	n.a.	n.a.	n.a.	n.a.	n.a.	n.a.	n.a.	n.a.	n.a.	n.a.	n.a.	n.a.	n.a.	n.a.	n.a.	n.a.	n.a.	n.a.	n.a.	n.a.	n.a.	n.a.	n.a.	n.a.	n.a.	n.a.	n.a.	n.a.	n.a.
106	Akal et al. 2013	Lamproites	Afyon region	n.a.	51.41	10.22	n.a.	5.09	8.54	1.55	7.87	1.35	1.62	0.18	4.6	n.a.	n.a.	n.a.	n.a.	n.a.	n.a.	n.a.	n.a.	n.a.	n.a.	n.a.	n.a.	n.a.	n.a.	n.a.	n.a.	n.a.	n.a.	n.a.	n.a.	n.a.	n.a.	n.a.	n.a.	n.a.	n.a.	n.a.	n.a.	n.a.	n.a.	n.a.	n.a.	n.a.	n.a.
107/4	Akal et al. 2013	Lamproites	Afyon region	n.a.	52.42	9.99	n.a.	4.56	5.94	1.43	6.52	1.37	1.68	0.36	5.4	n.a.	n.a.	n.a.	n.a.	n.a.	n.a.	n.a.	n.a.	n.a.	n.a.	n.a.	n.a.	n.a.	n.a.	n.a.	n.a.	n.a.	n.a.	n.a.	n.a.	n.a.	n.a.	n.a.	n.a.	n.a.	n.a.	n.a.	n.a.	n.a.	n.a.	n.a.	n.a.	n.a.	n.a.
107/5	Akal et al. 2013	Lamproites	Afyon region	n.a.	52.4	10.01	n.a.	4.29	5.61	1.43	6.97	1.36	1.62	0.41	5.5	n.a.	n.a.	n.a.	n.a.	n.a.	n.a.	n.a.	n.a.	n.a.	n.a.	n.a.	n.a.	n.a.	n.a.	n.a.	n.a.	n.a.	n.a.	n.a.	n.a.	n.a.	n.a.	n.a.	n.a.	n.a.	n.a.	n.a.	n.a.	n.a.	n.a.	n.a.	n.a.	n.a.	n.a.
114/2	Akal et al. 2013	Lamproites	Afyon region	n.a.	50.84	9.38	n.a.	8.01	8.18	1.34	7.49	1.07	1.41	0.12	4.8	n.a.	n.a.	n.a.	n.a.	n.a.	n.a.	n.a.	n.a.	n.a.	n.a.	n.a.	n.a.	n.a.	n.a.	n.a.	n.a.	n.a.	n.a.	n.a.	n.a.	n.a.	n.a.	n.a.	n.a.	n.a.	n.a.	n.a.	n.a.	n.a.	n.a.	n.a.	n.a.	n.a.	n.a.
114/5	Akal et al. 2013	Lamproites	Afyon region	n.a.	50.46	9.32	n.a.	7.02	9.2	1.42	7.31	1.07	1.48	0.19	5.3	n.a.	n.a.	n.a.	n.a.	n.a.	n.a.	n.a.	n.a.	n.a.	n.a.	n.a.	n.a.	n.a.	n.a.	n.a.	n.a.	n.a.	n.a.	n.a.	n.a.	n.a.	n.a.	n.a.	n.a.	n.a.	n.a.	n.a.	n.a.	n.a.	n.a.	n.a.	n.a.	n.a.	n.a.
L1*	Coban and Flower 2007	Lamproites	Afyon-Sandıklılamproites	n.a.	n.a.	n.a.	n.a.	n.a.	n.a.	n.a.	n.a.	n.a.	n.a.	n.a.	n.a.	n.a.	n.a.	n.a.	n.a.	n.a.	n.a.	n.a.	n.a.	n.a.	n.a.	n.a.	n.a.	n.a.	n.a.	n.a.	n.a.	n.a.	n.a.	n.a.	n.a.	n.a.	45	90	10.76	46.3	9.01	2.06	7.18	n.a.	5.26	n.a.	2.34	n.a.	1.97
L2*	Coban and Flower 2007	Lamproites	Afyon-Sandıklılamproites	n.a.	n.a.	n.a.	n.a.	n.a.	n.a.	n.a.	n.a.	n.a.	n.a.	n.a.	n.a.	n.a.	n.a.	n.a.	n.a.	n.a.	n.a.	n.a.	n.a.	n.a.	n.a.	n.a.	n.a.	n.a.	n.a.	n.a.	n.a.	n.a.	n.a.	n.a.	n.a.	n.a.	46	93	11.13	48.1	9.3	2.17	7.37	n.a.	5.18	n.a.	2.46	n.a.	2.13
05 BH 05	Prelevic et al. 2015	Lamproites	Afyon alkaline complex	11.9	54	10.86	n.a.	4.97	6.92	1.42	8.29	1.34	1.73	0.19	5.94	n.a.	110.143	2196.44	974.787	40	10.0867	2.13333	241.997	6.48	0.779	16.3767	14.5933	13.64	617	291	n.a.	70.3733	n.a.	n.a.	n.a.	n.a.	28.7667	51.3433	6.13333	25.1933	5.15667	1.26533	4.38667	0.574333	3.39667	0.599333	1.53033	0.217	1.413
05 IL 01	Prelevic et al. 2015	Lamproites	Afyon alkaline complex	11.9	54.91	10.92	n.a.	5.06	7.18	1.7	8.19	1.34	1.83	0.08	1.76	n.a.	208	3942	1287	45	21.6	4	456	n.a.	n.a.	29	30	23	170	41	n.a.	167	n.a.	n.a.	n.a.	n.a.	n.a.	n.a.	n.a.	n.a.	n.a.	n.a.	n.a.	n.a.	n.a.	n.a.	n.a.	n.a.	n.a.
05 IL 02	Prelevic et al. 2015	Lamproites	Afyon alkaline complex	11.9	49.74	9.02	n.a.	7.68	10.1	1.44	7.19	0.96	1.42	0.12	2.03	n.a.	201	4145	1253	48	22.6	4.2	449	n.a.	n.a.	26	29	25	170	51	n.a.	163	n.a.	n.a.	n.a.	n.a.	n.a.	n.a.	n.a.	n.a.	n.a.	n.a.	n.a.	n.a.	n.a.	n.a.	n.a.	n.a.	n.a.
B1T	Coban and Flower 2007	Lamproites	Bucak	n.a.	47.61	9.37	n.a.	11.73	10.1	1.35	7.36	1.59	1.7	0.1	1.55	n.a.	302	3105	1651	10	17	4.7	929	20	10	20	178	n.a.	623	408	n.a.	n.a.	n.a.	n.a.	n.a.	n.a.	178	339	24.12	89.88	13.18	3.31	9.81	n.a.	5.55	n.a.	2.61	n.a.	1.92
B5T	Coban and Flower 2007	Lamproites	Bucak	n.a.	49.19	10.82	n.a.	10.39	8.39	1.95	6.32	1.77	1.56	0.11	1.68	n.a.	338	2284	1997	14	16	5.7	990	19	10	24	173	n.a.	566	469	n.a.	n.a.	n.a.	n.a.	n.a.	n.a.	146	272	29.54	111.13	16.42	3.94	11.24	n.a.	5.49	n.a.	2.15	n.a.	1.74
B6T	Coban and Flower 2007	Lamproites	Bucak	n.a.	47.62	9.48	n.a.	11.67	9.73	1.49	7.35	1.74	1.7	0.1	1.44	n.a.	293	3093	1664	12	16	5	955	19	10	19	184	n.a.	585	414	n.a.	n.a.	n.a.	n.a.	n.a.	n.a.	176	336	20.87	82.5	12.23	3.72	9.95	n.a.	4.24	n.a.	1.75	n.a.	1.84
B7T	Coban and Flower 2007	Lamproites	Bucak	n.a.	47.98	11	n.a.	11.64	9.11	1.64	4.81	1.64	1.62	0.12	2.11	n.a.	338	2528	2290	15	16	6	882	18	6	26	146	n.a.	647	510	n.a.	n.a.	n.a.	n.a.	n.a.	n.a.	147	277	21.55	82.41	14.31	3.58	10.32	n.a.	4.22	n.a.	1.8	n.a.	1.56
B3-TB	Coban and Flower 2007	Lamproites	Bucak	n.a.	48.66	10.43	n.a.	10.6	8.21	1.85	5.04	1.76	1.28	0.12	3.85	n.a.	525	2702	1485	11	10	<2	878	17	5	25	203	n.a.	618	569	n.a.	n.a.	n.a.	n.a.	n.a.	n.a.	188	321	21.91	81.91	12.71	3.66	10.76	n.a.	4.26	n.a.	1.87	n.a.	1.64
B6T-b	Coban and Flower 2007	Lamproites	Bucak	n.a.	48.26	9.53	n.a.	10.38	9.24	1.75	7.51	1.66	1.16	0.13	3.65	n.a.	195	2113	2213	46	15	6.6	674	14.8	4.9	27	176	n.a.	623	421	n.a.	n.a.	n.a.	n.a.	n.a.	n.a.	n.a.	n.a.	n.a.	n.a.	n.a.	n.a.	n.a.	n.a.	n.a.	n.a.	n.a.	n.a.	n.a.
BT1-b	Coban and Flower 2007	Lamproites	Bucak	n.a.	47.65	9.09	n.a.	11.03	8.51	2.13	6.56	1.71	1.42	0.11	2.58	n.a.	425	2222	1582	14	10	<2	1026	16	5	18	203	n.a.	583	471	n.a.	n.a.	n.a.	n.a.	n.a.	n.a.	n.a.	n.a.	n.a.	n.a.	n.a.	n.a.	n.a.	n.a.	n.a.	n.a.	n.a.	n.a.	n.a.
B6T-ba	Coban and Flower 2007	Lamproites	Bucak	n.a.	48.24	9.73	n.a.	10.59	9.25	1.45	8.51	1.66	1.17	0.13	2.45	n.a.	726	2435	1632	11	15	<2	965	17	7	16	190	n.a.	675	597	n.a.	n.a.	n.a.	n.a.	n.a.	n.a.	n.a.	n.a.	n.a.	n.a.	n.a.	n.a.	n.a.	n.a.	n.a.	n.a.	n.a.	n.a.	n.a.
A1	Coban and Flower 2007	Lamproites	Bucak	n.a.	47.5	9.5	n.a.	10.8	9.1	2.12	6.9	2.01	1.7	0.16	2.6	n.a.	225	1864	1839	42	18.2	9.3	940	16	4	28	164	n.a.	787	534	n.a.	n.a.	n.a.	n.a.	n.a.	n.a.	n.a.	n.a.	n.a.	n.a.	n.a.	n.a.	n.a.	n.a.	n.a.	n.a.	n.a.	n.a.	n.a.
A2	Coban and Flower 2007	Lamproites	Bucak	n.a.	46.8	10.4	n.a.	11.9	8.46	2.11	6.5	1.7	1.61	0.1	2.51	n.a.	235	1343	2073	15	14.6	7.8	480	17	8	21	147	n.a.	473	476	n.a.	n.a.	n.a.	n.a.	n.a.	n.a.	n.a.	n.a.	n.a.	n.a.	n.a.	n.a.	n.a.	n.a.	n.a.	n.a.	n.a.	n.a.	n.a.
B1a	Coban and Flower 2007	Lamproites	Bucak	n.a.	47.56	10.43	n.a.	12.23	8.55	2.31	5.72	1.5	1.82	0.11	1.8	n.a.	226	2147	2282	11	19.5	6.2	914	18	10	23	104	n.a.	602	372	n.a.	n.a.	n.a.	n.a.	n.a.	n.a.	n.a.	n.a.	n.a.	n.a.	n.a.	n.a.	n.a.	n.a.	n.a.	n.a.	n.a.	n.a.	n.a.
B2a	Coban and Flower 2007	Lamproites	Bucak	n.a.	45.72	9.9	n.a.	12.1	10.7	2.25	6.8	1.7	1.25	0.12	1.72	n.a.	221	1589	1896	19	19.8	10	591	20	6	22	162	n.a.	615	480	n.a.	n.a.	n.a.	n.a.	n.a.	n.a.	n.a.	n.a.	n.a.	n.a.	n.a.	n.a.	n.a.	n.a.	n.a.	n.a.	n.a.	n.a.	n.a.
B3	Coban and Flower 2007	Lamproites	Bucak	n.a.	47.6	9.91	n.a.	12.2	9.75	2.15	6.3	1.69	1.38	0.11	1.51	n.a.	189	1834	1347	26	22.4	5.7	570	17	5	19	172	n.a.	657	457	n.a.	n.a.	n.a.	n.a.	n.a.	n.a.	n.a.	n.a.	n.a.	n.a.	n.a.	n.a.	n.a.	n.a.	n.a.	n.a.	n.a.	n.a.	n.a.
B4	Coban and Flower 2007	Lamproites	Bucak	n.a.	46.7	9.3	n.a.	11.2	10.5	1.85	6.78	1.78	1.4	0.12	2.05	n.a.	205	1453	1846	43	17.4	5.9	319	15	5	29	188	n.a.	696	474	n.a.	n.a.	n.a.	n.a.	n.a.	n.a.	n.a.	n.a.	n.a.	n.a.	n.a.	n.a.	n.a.	n.a.	n.a.	n.a.	n.a.	n.a.	n.a.
B5	Coban and Flower 2007	Lamproites	Bucak	n.a.	47.1	8.89	n.a.	12.9	9.5	1.76	6.3	1.95	1.59	0.13	1.9	n.a.	267	1910	1371	52	20.8	6.5	291	15	4	23	216	n.a.	792	463	n.a.	n.a.	n.a.	n.a.	n.a.	n.a.	n.a.	n.a.	n.a.	n.a.	n.a.	n.a.	n.a.	n.a.	n.a.	n.a.	n.a.	n.a.	n.a.
KY-03	Yilmaz 2010	Lamproite like k-rich rocks	Karanlık Stream	n.a.	50.09	11.43	6.97	6.96	9.3	2.04	4.67	1.84	1.63	0.09	4.3	n.a.	90.9	1443	2308.9	14.7	19.4	3.5	501.8	11.8	8	24.1	152.3	17	294	276	n.a.	n.a.	n.a.	n.a.	n.a.	n.a.	128.9	268.2	28.92	109.1	14.9	3.95	8.64	1.09	4.59	0.73	1.85	0.23	1.67
KY-09	Yilmaz 2010	Lamproite like k-rich rocks	Taş Hill	n.a.	51.44	11.68	6.51	6.73	8	2.03	5.52	1.85	1.4	0.09	4.1	n.a.	175.6	1422	2180.6	13.9	20.5	2.7	527.4	12.7	7.5	23.3	148.4	15	260	206	n.a.	n.a.	n.a.	n.a.	n.a.	n.a.	120.9	272.8	26.92	94.2	13.9	3.51	7.54	1.05	4.64	0.73	1.7	0.22	1.5
KY-10	Yilmaz 2010	Lamproite like k-rich rocks	Taş Hill	n.a.	50.58	11.62	6.24	6.74	9	2.7	5.69	1.79	1.63	0.09	3.3	n.a.	164.3	1366	1929.9	14.4	15.9	4.8	500.6	13.1	7.3	21.6	148.2	15	253	164	n.a.	n.a.	n.a.	n.a.	n.a.	n.a.	117.7	248.6	25.56	88.9	13.2	3.36	8.08	0.94	4.3	0.64	1.6	0.19	1.47
KY-14	Yilmaz 2010	Lamproite like k-rich rocks	Müftü Hill	n.a.	50.82	11.72	6.7	7.36	9.43	2.23	5.32	1.81	1.49	0.1	3.4	n.a.	294.5	1430	2384.7	12.8	16.1	6.2	549.6	13	7.2	23.3	143.9	15	260	239	n.a.	n.a.	n.a.	n.a.	n.a.	n.a.	122.9	256	27.36	100.8	14.4	3.77	8.52	1.03	4.49	0.67	1.72	0.21	1.57
KY-15	Yilmaz 2010	Lamproite like k-rich rocks	Müftü Hill	n.a.	49.37	11.68	7.12	7.93	8.76	2.12	4.63	1.77	1.67	0.1	3.7	n.a.	136.8	1471	2206.1	10.2	17.9	2.9	519.4	12.1	6.3	23.9	126	17	308	220	n.a.	n.a.	n.a.	n.a.	n.a.	n.a.	127.8	261.7	28.3	99.5	14.9	3.97	8.38	1.06	4.97	0.71	1.86	0.25	1.57
KY-20	Yilmaz 2010	Lamproite like k-rich rocks	Güvercinlik Stream	n.a.	50.05	11.98	6.73	7.36	8.44	2.26	4.84	1.57	1.6	0.1	4.1	n.a.	144.2	1372	2242.3	9.7	18.2	4.9	457.5	11.2	5.1	24.4	106	16	267	198	n.a.	n.a.	n.a.	n.a.	n.a.	n.a.	121	246.5	27.44	100	14.1	3.65	6.99	1.01	4.61	0.75	1.75	0.26	1.57
KY-01	Yilmaz 2010	Lamproite like k-rich rocks	Taşlı Hill	n.a.	48.82	10.86	6.29	8.14	11.83	3.7	2.6	1.48	1.67	0.1	3.6	n.a.	116	1905	3085.5	17.1	41.2	8.4	479.7	10.8	3.5	25.9	86.9	21	383	103	n.a.	n.a.	n.a.	n.a.	n.a.	n.a.	170.4	346.2	39.23	149.8	20.9	5.33	10.73	1.27	5.26	0.81	1.78	0.29	1.89
KY-02	Yilmaz 2010	Lamproite like k-rich rocks	Taşlı Hill	n.a.	49.37	11	6.15	7.96	11.13	2.75	3.73	1.43	1.55	0.1	4	n.a.	79.8	2265	2918.9	13.9	28.8	6.6	402.7	9.7	3.4	23.1	72.2	21	369	110	n.a.	n.a.	n.a.	n.a.	n.a.	n.a.	165.5	331.5	37.28	141.2	20	5	9.7	1.33	4.92	0.69	1.76	0.24	1.42
KY-06	Yilmaz 2010	Lamproite like k-rich rocks	Acılı Hill	n.a.	56.63	12.94	5.18	5.37	7.11	3.34	5.12	1.09	1.02	0.07	1.6	n.a.	162.8	1357	1755.8	2.5	27.7	7.5	439.5	11	4.1	25.8	79.7	16	301	97	n.a.	n.a.	n.a.	n.a.	n.a.	n.a.	123.4	241.7	25.62	91.8	12.6	3.3	7.46	0.96	4.4	0.76	2.05	0.26	1.65
KY-07	Yilmaz 2010	Lamproite like k-rich rocks	Acılı Hill	n.a.	57.02	13	5.04	5.16	6.89	3.43	5.07	1.05	0.97	0.09	1.7	n.a.	164.7	1363	1779.3	2.3	25.3	7.3	421.3	10.5	3.6	24.3	75.7	16	287	96	n.a.	n.a.	n.a.	n.a.	n.a.	n.a.	119.7	235.9	24.44	88.3	12	3.18	7.27	0.89	4.21	0.71	1.71	0.23	1.68
KY-08	Yilmaz 2010	Lamproite like k-rich rocks	Tepeliceyayla Hill	n.a.	53.97	12.15	5.38	5.94	9.4	3.34	4.5	1.19	1.19	0.09	2.2	n.a.	105.1	1594	2572.8	7.5	27.7	2.4	325	8.1	3.2	21.5	65.7	18	226	80	n.a.	n.a.	n.a.	n.a.	n.a.	n.a.	137.6	287.5	30.45	111.6	16.5	4.17	8.49	1.02	4.45	0.63	1.61	0.18	1.49
KY-11	Yilmaz 2010	Lamproite like k-rich rocks	Taşlı Hill	n.a.	54.54	12.11	5.24	6.22	8.98	3.14	5.08	1.13	1.34	0.09	1.5	n.a.	146.5	1681	2447.1	8.3	24.6	2.4	316.3	7.6	2.7	22.9	58.7	17	246	95	n.a.	n.a.	n.a.	n.a.	n.a.	n.a.	139.8	292.9	30.53	108	16	4.08	9.71	1.07	4.74	0.62	1.61	0.17	1.49
KY-12	Yilmaz 2010	Lamproite like k-rich rocks	Taşlı Hill	n.a.	54.31	12.14	5.27	6.19	9.24	3.17	5	1.15	1.38	0.08	1.6	n.a.	143.1	1613	2478	8.2	23.9	3.3	325.1	8.2	2.9	22	59.9	17	240	62	n.a.	n.a.	n.a.	n.a.	n.a.	n.a.	137.9	287.8	29.84	107.1	16.2	3.94	8.85	0.99	4.42	0.61	1.53	0.2	1.38
KY-13	Yilmaz 2010	Lamproite like k-rich rocks	Taş Hill	n.a.	50.23	12.21	6.9	7.57	9.03	3.42	4.82	1.58	1.72	0.11	1.8	n.a.	130.2	1369	2333.1	6.9	16.9	6.2	448.5	10.7	5.2	24.1	103.3	17	281	170	n.a.	n.a.	n.a.	n.a.	n.a.	n.a.	126.4	262.9	27.53	96.3	14.6	3.91	8.64	1.08	4.93	0.76	1.98	0.23	1.85
KY-16	Yilmaz 2010	Lamproite like k-rich rocks	Karanlık Stream	n.a.	50.68	12.22	6.75	7.37	8.83	3.19	4.99	1.55	1.64	0.11	2.1	n.a.	157.1	1386	2385.3	7.3	18	4.4	457.1	10.8	5.2	24.1	103.1	17	287	144	n.a.	n.a.	n.a.	n.a.	n.a.	n.a.	125.5	257.5	27.68	103.1	14.4	3.84	8.72	1.07	4.9	0.77	1.88	0.26	1.77
KY-17	Yilmaz 2010	Lamproite like k-rich rocks	Tepeliceyayla Hill	n.a.	53.06	12.03	5.71	6.34	9.64	3.52	4.85	1.26	1.36	0.1	1.5	n.a.	141.6	1592	2799.7	23	23.7	5.1	330	8.2	3.3	24.7	68.3	18	253	69	n.a.	n.a.	n.a.	n.a.	n.a.	n.a.	146.7	289.8	31.99	117.3	17.4	4.44	9.86	1.13	4.79	0.71	1.75	0.27	1.5
KL07	Soder et al. 2016	Amphibolelamprophyres	Kos lamprophyre dikes	n.a.	51.5	13.2	8.08	8.74	11	2.28	1.23	0.84	0.4	0.14	2.02	1.9	33	1190	1360	18	20	5.6	154	4.3	0.8	24	15	41	234	56	35	230	n.a.	n.a.	n.a.	n.a.	61	126	15	60	10	2.6	7.4	0.9	4.9	0.9	2.5	0.33	2.2
KL36	Soder et al. 2016	Amphibolelamprophyres	Kos lamprophyre dikes	n.a.	52.3	14.8	6.66	6.18	8.64	2.82	2.85	0.96	0.46	0.12	3.83	10.7	81	1430	1290	19	27	7.1	241	6.3	1.3	29	23	31	178	46	26	200	n.a.	n.a.	n.a.	n.a.	66	134	15	60	11	2.7	8.3	1	6	1.1	2.8	0.38	2.6
KL78/1	Soder et al. 2016	Amphibolelamprophyres	Kos lamprophyre dikes	n.a.	53.5	14.2	6.68	7.19	8.8	2.85	3.1	0.89	0.41	0.12	0.9	1.3	66	1330	992	23	22	5.9	189	5.3	1.1	23	17	33	247	53	24	179	n.a.	n.a.	n.a.	n.a.	53	105	12	47	9	2.2	6.7	0.9	4.8	0.9	2.4	0.33	2.1
KL02	Soder et al. 2016	Amphibolelamprophyres	Kos lamprophyre dikes	n.a.	53.2	14.7	7.14	5.69	7.55	2.9	3.25	0.7	0.71	0.11	2.02	3.7	64	3310	3010	23	41	7.8	195	4.8	1.4	27	33	26	138	26	22	180	n.a.	n.a.	n.a.	n.a.	182	345	40	151	21	4.9	11.5	1.2	5.7	1	2.4	0.34	2.3
KL10	Soder et al. 2016	Amphibolelamprophyres	Kos lamprophyre dikes	n.a.	49.4	15.2	8.56	6.42	8.15	2.75	3.38	0.84	0.88	0.16	2.02	2	73	4950	3960	38	46	7.9	202	4.8	1.3	31	34	28	36	33	33	240	n.a.	n.a.	n.a.	n.a.	250	450	58	217	29	7.1	15	1.5	6.9	1.1	2.8	0.35	2.4
KL52	Soder et al. 2016	Amphibolelamprophyres	Kos lamprophyre dikes	n.a.	48.3	13.2	7.69	7.98	11.7	2.5	2.37	0.85	0.75	0.16	2.75	1	33	2810	2350	23	30	5.6	188	4.5	1.3	29	27	42	245	52	27	237	n.a.	n.a.	n.a.	n.a.	160	337	39	153	23	5.8	13.9	1.4	6.9	1.1	2.7	0.35	2.2
KL64	Soder et al. 2016	Amphibolelamprophyres	Kos lamprophyre dikes	n.a.	57.1	16.4	5.8	3.12	5.82	3.49	4.23	0.72	0.67	0.11	1.01	5	126	2870	2290	19	51	11.4	320	7.2	3.5	32	64	16	19	12	17	171	n.a.	n.a.	n.a.	n.a.	167	325	36	133	19	4.5	11.9	1.2	6.6	1.1	2.7	0.39	2.6
KL73	Soder et al. 2016	Amphibolelamprophyres	Kos lamprophyre dikes	n.a.	53.4	16	6.36	3.65	6.71	3.62	4.57	0.82	0.77	0.09	2.84	2.1	120	2980	1800	21	44	9.8	280	6.3	3.1	31	59	17	16	14	19	184	n.a.	n.a.	n.a.	n.a.	157	313	35	131	19	4.5	11.6	1.3	6.5	1.1	2.8	0.39	2.5
KL12	Soder et al. 2016	Amphibolelamprophyres	Kos lamprophyre dikes	n.a.	45.5	14.1	8.51	7.06	11.5	2.43	3.55	1.31	1.72	0.14	2.57	3.8	139	3640	2380	12	29	6.1	280	6	4.7	36	144	35	59	29	29	293	n.a.	n.a.	n.a.	n.a.	209	406	43	153	22	5.5	13.6	1.5	7.5	1.2	3	0.4	2.6
KL14	Soder et al. 2016	Amphibolelamprophyres	Kos lamprophyre dikes	n.a.	43.5	16.4	8.12	5.62	9.98	2.95	3.37	1	1.52	0.15	6.25	2.7	95	3800	2950	20	26	5.9	259	5.8	3.9	34	111	25	28	24	26	274	n.a.	n.a.	n.a.	n.a.	159	333	37	137	20	5.2	12	1.3	6.9	1.2	3	0.44	2.8
KL41	Soder et al. 2016	Amphibolelamprophyres	Kos lamprophyre dikes	n.a.	41.8	16.2	8.67	5.71	11.3	2.89	2.7	1.17	1.25	0.1	7.22	5	66	3420	2400	16	34	7.1	220	4.8	2.7	33	80	28	19	20	25	295	n.a.	n.a.	n.a.	n.a.	197	400	43	160	22	5.9	13.2	1.4	7.1	1.2	3	0.42	2.6
KL95	Soder et al. 2016	Amphibolelamprophyres	Kos lamprophyre dikes	n.a.	42.7	15.8	9.23	6.85	11.3	2.75	3.03	1.2	1.78	0.15	3.85	2.4	65	2910	2390	16	19	4.2	207	5.1	3.1	30	88	32	36	31	29	296	n.a.	n.a.	n.a.	n.a.	132	286	33	121	18	4.7	11.6	1.3	6.7	1.2	2.8	0.37	2.4
KL54	Soder et al. 2016	Mica lamprophyres	Kos lamprophyre dikes	n.a.	48.3	14.3	7.73	7.77	9.68	2.35	3.79	1	0.73	0.14	2.46	3.1	124	2360	1430	17	17	3.5	260	6.6	0.9	29	19	35	383	74	29	235	n.a.	n.a.	n.a.	n.a.	71	156	19	76	13	3.4	9.2	1.1	6.1	1.1	2.8	0.37	2.5
KL66	Soder et al. 2016	Mica lamprophyres	Kos lamprophyre dikes	n.a.	44.7	14.6	8.11	9.24	10.4	2.75	2.71	1.05	1.18	0.14	3.94	3	72	1780	1410	5	13	2.9	299	7.5	1.6	30	35	41	287	111	34	231	n.a.	n.a.	n.a.	n.a.	69	153	18	75	13	3.4	9.1	1.1	6	1.1	2.8	0.37	2.7
KL37	Soder et al. 2016	Mica lamprophyres	Kos lamprophyre dikes	n.a.	48.5	15.4	7.03	5.7	10.6	2.62	3.8	0.87	1.21	0.14	2.83	2.2	107	1650	2180	5	30	7.5	391	9.8	2	35	42	36	159	38	25	231	n.a.	n.a.	n.a.	n.a.	101	206	24	94	16	4.3	11.4	1.4	7.3	1.3	3.4	0.45	3
KL40	Soder et al. 2016	Mica lamprophyres	Kos lamprophyre dikes	n.a.	48.3	16.6	7.42	4.49	9.02	2.34	5.19	1	1.09	0.15	2.96	2.2	134	2530	2180	5	27	6.3	387	9.1	3	34	71	24	50	22	27	219	n.a.	n.a.	n.a.	n.a.	145	282	31	114	17	4.4	11.2	1.3	7.1	1.2	3.2	0.45	3
KL45	Soder et al. 2016	Mica lamprophyres	Kos lamprophyre dikes	n.a.	49	14.8	6.75	5.75	8.02	3.02	5.19	0.84	0.98	0.12	4.43	1.7	110	3790	2200	15	46	9.7	367	9.1	1.8	33	38	31	147	39	27	209	n.a.	n.a.	n.a.	n.a.	176	347	39	150	23	5.8	14.2	1.5	7.6	1.2	3.1	0.38	2.7
KL22	Soder et al. 2016	Mica lamprophyres	Kos lamprophyre dikes	n.a.	47	14.7	7.89	6.7	9.74	2.48	4.49	1.13	1.05	0.16	3.59	3.2	161	1950	1420	49	16	4.3	361	8.9	2.2	31	53	39	178	43	30	261	n.a.	n.a.	n.a.	n.a.	85	181	21	82	14	3.5	9.6	1.2	6.4	1.2	2.9	0.38	2.5
KL27	Soder et al. 2016	Mica lamprophyres	Kos lamprophyre dikes	n.a.	49.8	15.6	6.52	5.41	7.3	2.34	6.38	1	0.85	0.11	3.73	5.1	236	2110	1170	34	25	5.9	412	10.3	2.2	30	42	34	164	36	22	213	n.a.	n.a.	n.a.	n.a.	76	154	18	70	12	2.9	8.3	1	6	1.1	2.9	0.41	2.8
KL28	Soder et al. 2016	Mica lamprophyres	Kos lamprophyre dikes	n.a.	48.5	14.7	7.98	6.95	9.65	1.86	5.46	1.16	1.02	0.15	1.01	5.6	221	2200	1750	22	16	4.8	380	9.7	2.2	31	51	43	164	44	29	270	n.a.	n.a.	n.a.	n.a.	83	182	21	84	15	3.7	10.4	1.2	6.5	1.2	2.9	0.4	2.6
KL59	Soder et al. 2016	Mica lamprophyres	Kos lamprophyre dikes	n.a.	49.6	15.1	7.06	6.33	8.33	3.11	4	1.03	0.96	0.14	3.25	3.1	110	1810	929	9	20	4.8	391	9.4	2	29	40	37	193	52	23	205	n.a.	n.a.	n.a.	n.a.	74	153	18	72	12	3.2	8.5	1	5.7	1	2.9	0.42	2.8
KL80	Soder et al. 2016	Mica lamprophyres	Kos lamprophyre dikes	n.a.	48.2	17.2	6.96	4.43	7.97	2.96	4.38	0.89	1.06	0.13	5.28	4.2	92	2750	1970	19	22	4.9	395	9.2	1.8	29	45	24	57	19	20	229	n.a.	n.a.	n.a.	n.a.	101	207	24	94	15	4.3	10.3	1.2	6.1	1.1	2.9	0.37	2.6
KL16	Soder et al. 2016	Mica lamprophyres	Kos lamprophyre dikes	n.a.	51.5	17.5	5.27	2.81	6.03	3.01	7.21	0.59	0.54	0.12	3.7	4.4	134	4390	3560	91	45	8.5	422	8.4	2	37	43	15	42	16	16	174	n.a.	n.a.	n.a.	n.a.	222	410	47	175	26	6.8	15.2	1.6	7.7	1.2	3	0.43	2.8
KL63	Soder et al. 2016	Mica lamprophyres	Kos lamprophyre dikes	n.a.	54.2	17.3	5.93	3.18	5.67	3.6	5.8	0.67	0.7	0.12	1.25	1.7	96	3350	2700	51	37	6.9	457	10.2	2.5	36	51	19	26	16	15	185	n.a.	n.a.	n.a.	n.a.	154	299	34	127	20	5.1	13.4	1.5	7.9	1.3	3.4	0.38	2.8
LL630B	Pe-Piper et al. 2014	Lamproitic; Flow	Lesbos, A.Nektarios	n.a.	57.15	15.19	n.a.	3.64	6.97	2.88	3.47	0.95	0.63	0.1	2.75	10.2	134	2160	797	39	18	3.11	285	8.6	1.01	22	20.4	19	393	161	26	140	n.a.	20	86	37	45.4	86.5	10.1	39.9	7.17	1.76	5.84	0.8	4.32	0.81	2.48	0.38	2.42
LL632	Pe-Piper et al. 2014	Lamproitic; Flow	A.Nektarios	n.a.	55.14	12.54	n.a.	3.64	8.96	2.2	4.95	1.16	0.57	0.12	4.65	15.4	239	1130	538	24	34.5	6.26	407	12.7	2.51	20	38	19	528	199	24	124	n.a.	20	78	53	53.8	126	15.6	63.1	10.5	2.06	7.02	0.86	4.19	0.74	2.17	0.32	1.87
LL635	Pe-Piper et al. 2014	Lamproitic; Flow	A.Nektarios	n.a.	53.69	15.81	n.a.	7.73	8.52	2.8	1.72	0.68	0.17	0.12	1	1.5	57	1090	564	34	8.3	1.86	98	3.2	0.41	18	8.7	26	336	160	29	157	n.a.	18	80	56	25.5	47.7	5.37	21.5	4.3	1.13	3.8	0.59	3.44	0.67	2	0.32	1.94
LL639	Pe-Piper et al. 2014	Lamproitic; Flow	Sykaminea-	n.a.	49.72	11.72	n.a.	12.03	8.5	1.81	3.72	1.07	1.11	0.13	2.42	4.4	116	2520	759	30	14.3	3.24	322	9.9	1	17	24.1	27	814	298	41	165	n.a.	17	74	47	30.6	67.4	8.64	37.2	6.76	1.8	5.15	0.69	3.51	0.62	1.8	0.26	1.6
LL641B	Pe-Piper et al. 2014	Lamproitic; Flow	Sykaminea-	n.a.	49.78	14.29	n.a.	9.69	10.5	2.33	1.79	0.89	0.35	0.14	2.15	1.4	78	927	464	32	6.5	1.59	120	3.7	0.57	17	10.6	31	751	244	45	198	n.a.	16	75	72	16.2	33.9	4.15	18	3.77	1.17	3.67	0.56	3.26	0.63	1.91	0.3	1.83
LL643	Pe-Piper et al. 2014	Lamproitic; Flow	Sykaminea-	n.a.	49.07	13.94	n.a.	9.74	9.25	2.17	2.52	1.11	0.67	0.12	3.74	3.2	71	1530	602	26	11.6	2.86	206	6	1.17	18	24.2	30	654	214	41	200	n.a.	16	77	31	24.8	52.7	6.33	27.4	5.3	1.52	4.56	0.62	3.49	0.66	1.92	0.3	1.81
LL646	Pe-Piper et al. 2014	Lamproitic; Flow	A.Nektarios	n.a.	53.47	16.31	n.a.	7.04	8.29	3.05	1.65	0.67	0.19	0.12	1.53	6.2	54	830	574	35	9.5	2.39	122	3.7	0.65	17	11.3	22	460	162	24	137	n.a.	17	73	40	23.7	46.5	5.14	20.3	3.91	1.17	3.79	0.57	3.22	0.63	1.96	0.3	1.9
LL650	Pe-Piper et al. 2014	Lamproitic; Flow	Mytilene	n.a.	59.37	18.51	n.a.	1.54	6.63	3.69	2.59	0.74	0.23	0.05	2.83	4.1	70	1160	699	43	16.9	5.13	146	4.5	0.99	23	12.9	21	338	95	13	139	n.a.	21	56	38	40.5	67.4	7.93	30.3	5.4	1.47	5.19	0.72	4.08	0.79	2.41	0.38	2.28
LL651	Pe-Piper et al. 2014	Lamproitic; Flow	Mytilene	n.a.	55.32	14.54	n.a.	4.95	8.49	2.84	2.11	0.59	0.2	0.12	4.73	19.9	107	902	620	42	13.6	4.27	124	3.7	0.78	15	10.7	18	317	119	25	114	n.a.	17	60	40	28.7	53.7	5.81	22.1	3.95	1.03	3.48	0.48	2.7	0.52	1.59	0.24	1.48
LL652	Pe-Piper et al. 2014	Lamproitic; Flow	Mytilene	n.a.	55.18	14.41	n.a.	4.26	9.51	2.91	2.31	0.6	0.19	0.1	4	11	101	874	651	39	13.7	4.13	126	3.8	0.77	15	10.6	19	330	116	23	120	n.a.	17	64	38	29.2	55	5.88	22.4	4.06	1.08	3.47	0.5	2.78	0.54	1.63	0.26	1.57
LL653	Pe-Piper et al. 2014	Lamproitic; Flow	Mytilene	n.a.	56.5	15.13	n.a.	4.35	9.1	3.07	2.03	0.69	0.2	0.12	3.03	15.1	89	952	635	31	13.7	4.04	128	3.8	0.85	16	11.5	18	316	97	23	123	n.a.	18	64	37	31.3	58.1	6.18	24	4.33	1.18	3.73	0.54	3.04	0.58	1.78	0.27	1.68
LL654	Pe-Piper et al. 2014	Lamproitic; Flow	Mytilene	n.a.	59.96	15.77	n.a.	3.72	6.71	3.26	2.46	0.6	0.18	0.07	1.89	4.8	106	856	522	39	14.7	4.61	132	3.9	0.86	16	11	18	249	86	20	109	n.a.	19	62	30	30.3	55.3	6.03	23	4.18	1.06	3.6	0.52	2.93	0.56	1.69	0.27	1.66
					Radiogenic argon contents
					40Ar* 71.3, 68.1, 67.6%
					40Ar* 64.9, 72.8, 71.0%
					40Ar* 21.9, 21.5, 25.2%
					40Ar* 59.0, 54.7, 54.8, 56.3%
					40Ar* 22.2, 19.2, 23.8 %
					Radiogenic argon contents
					17.85% / 19.93%
					32.50% / 17.66%
					33.89% / 28.85%
[truncated: 55 more columns]
